# ROYAL SOCIETY OPEN SCIENCE

rsos.royalsocietypublishing.org

Research

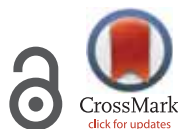

Article submitted to journal

## Subject Areas:

osteoporosis, trabecular bone, morphometry

## Keywords:

Ellipsoid Factor, SMI, plates, rods, trabecular bone, osteoporosis

## Author for correspondence:

Alessandro Felder

e-mail: [a.felder@ucl.ac.uk](mailto:a.felder@ucl.ac.uk)

# The plate-to-rod transition in trabecular bone loss is elusive

A. A. Felder<sup>1,2</sup>, S. Monzem<sup>1,3</sup>, R. De Souza<sup>3</sup>, B. Javaheri<sup>1</sup>, D. Mills<sup>4</sup>, A. Boyde<sup>4</sup> and M. Doube<sup>1,5</sup>

<sup>1</sup>Royal Veterinary College, London, UK

<sup>2</sup>University College London, London, UK

<sup>3</sup>Universidade Federal de Mato Grosso, Cuiabá, Brazil

<sup>4</sup>Queen Mary University of London, London, UK

<sup>5</sup>City University of Hong Kong, Kowloon, Hong Kong SAR China

Changes in trabecular micro-architecture are key to our understanding of osteoporosis. Previous work focusing on structure model index (SMI) measurements have concluded that disease progression entails a shift from plates to rods in trabecular bone, but SMI is heavily biased by bone volume fraction. As an alternative to SMI, Ellipsoid Factor (EF) has been proposed as a continuous measure of local trabecular shape between plate-like and rod-like extremes. We investigated the relationship between EF distributions, SMI and bone volume fraction of the trabecular geometry in a murine model of disease osteoporosis as well as from human vertebrae of differing bone volume fraction. We observed a moderate shift in EF median (at later disease stages in mouse tibia) and EF mode (in the vertebral samples with low bone volume fraction) towards a more rod-like geometry, but not in EF maximum and minimum. These results support the notion that the plate to rod transition does not coincide with the onset of bone loss and is considerably more moderate, when it does occur, than SMI suggests. A variety of local shapes not straightforward to categorise as rod or plate exist in all our trabecular bone samples.

## 1. Introduction

The metabolic bone disease osteoporosis is a major health concern associated with high mortality rates and considerable economic costs [1,2], likely to be exacerbated by the increase in the proportion of elderly

© 2014 The Authors. Published by the Royal Society under the terms of the Creative Commons Attribution License <http://creativecommons.org/licenses/by/4.0/>, which permits unrestricted use, provided the original author and source are credited.

2 people in future demographics. In this disease, imbalance between osteoblastic (bone-forming)  
3 and osteoclastic (bone-resorbing) cell activity is thought to lead to lower bone turnover and  
4 relatively higher resorption than formation, and thus to a lower amount of bone [3]. Lower bone  
5 mass causes reduced mechanical competence and increased fracture risk with age [4].

6 The large amount of bone surface relative to bone volume in trabecular bone (compared to  
7 cortical bone) may make it particularly sensitive to shifts in the bone remodelling balance [5].  
8 Beyond the loss of bone volume fraction in the trabecular bone compartment, changes in tissue  
9 morphology may contribute to the deterioration of bone quality of osteoporotic patients. Because  
10 such osteoporosis-related changes to the trabecular bone micro-architecture form a link between  
11 the bone (re)modelling balance at a tissue level and the mechanical performance of the bone  
12 organ, they are key to our understanding of the disease.

13 Prominent amongst parameters considered when evaluating tissue-level morphological  
14 changes is *structure model index* (SMI) [6]. SMI was designed to estimate how rod- or plate-like  
15 a trabecular geometry is [7]. Evaluation of SMI across a number of data sets from human patients  
16 and animal models suggests that trabecular geometry transitions from being more plate-like to  
17 more rod-like as osteoporosis severity increases ("plate-to-rod transition") [8–12]. However, it is  
18 well known that SMI correlates strongly with bone volume fraction, rendering the comparison  
19 of SMI values between samples of vastly different bone volume fraction (such as osteoporotic  
20 samples versus healthy control samples) dubious. Furthermore, the concept of SMI is based on  
21 relative changes in surface area in response to a small dilation, and relies on the fact that dilating  
22 a convex shape (such as a sphere (SMI=4), a cylinder (SMI=3), or a infinite plane (SMI=1) always  
23 creates a larger surface area. This is not the case in trabecular bone, because parts of the trabecular  
24 bone surface are concave and become smaller when the volume is expanded [13].

25 Ellipsoid Factor (EF) has been proposed as an alternative method to measure the plate-to-rod  
26 transition in trabecular bone [14]. EF has since been used within and beyond bone biology (e.g.  
27 bone surgical implant testing [15] and the characterisation of the trabecular bone phenotype of  
28 genetic dwarfism [16], of the primate mandible [17], of the human tibia [18], and of animal models  
29 of osteoarthritis [19], but also studies of fuel cell performance [20,21]). Apart from the original  
30 critique of SMI [13], as far as we know, there have been no further reports of EF in osteoporotic  
31 samples in the literature.

32 In this study, we expand on our two previous studies on the use of EF and the putative  
33 plate-to-rod transition in osteoporosis [13,14]. Specifically, we present new EF data on trabecular  
34 bone from an animal model of disuse osteoporosis as well as from human second lumbar (L2)  
35 vertebral bodies from women of varying age and bone volume fraction. The aim of the study is to  
36 investigate the association between variables describing the trabecular architecture (EF and SMI)  
37 and bone health. Our EF data relies on an updated and validated implementation of EF (details  
38 in Supplementary Material (a)) available freely as part of the latest BoneJ, a collection of ImageJ  
39 plug-ins intended for skeletal biology [22].

## 40 2. Methods

### 41 (a) EF algorithm

42 The EF algorithm was first reported in a previous study [14] and is explained here again due to  
43 its fundamental relevance to the present study.

EF is a scalar value assigned to each foreground pixel in the three-dimensional binary image  
stack of interest. The EF of each pixel depends on the maximal ellipsoid that contains the pixel  
and that is contained in the image foreground. Denoting the axis lengths of the maximal ellipsoid  
as  $a, b$  and  $c$  (with  $a \leq b \leq c$ ), EF of each pixel is calculated as a difference of sorted axis ratios

$$EF = \frac{a}{b} - \frac{b}{c}$$

44 EF is confined between -1 and 1, with -1 being very plate-like, and 1 very rod-like.

45 Ellipsoid Factor is calculated by fitting locally maximal ellipsoids into the image foreground,  
46 then iterating over the foreground pixels to find the largest ellipsoid in which each pixel is  
47 contained. Note that the locally maximal ellipsoid is generally non-unique (Supplementary  
48 Material ii).

#### 49 (i) Ellipsoid fitting

50 First, points where a small sphere can start to grow ("seed points") are determined. Two  
51 strategies for finding seed points exist. The first is called distance-ridge based seeding. It involves  
52 subtracting the results of a morphological opening and a closing operations on the distance  
53 transform of the input image from each other. The second is a topology-preserving skeletonisation  
54 [23]. Distance-ridge based seeding is computationally more efficient than skeletonisation in  
55 practice, but it may miss thin features that skeletonisation preserves well and may overestimate  
56 the number of seed points needed to fit ellipsoids to a plate.

57 After being seeded, each spherical ellipsoid grows uniformly by one user-defined increment at  
58 a time until a number of surface points equal to the user-defined "contact sensitivity" parameter  
59 hit the trabecular bone boundary (a background pixel). Surface points are chosen from a random  
60 uniform distribution on the ellipsoid surface.

61 When the growing ellipsoid hits the trabecular bone boundary for the first time, the vector  
62 from the ellipsoid centre to the average contact point is set as the first ellipsoid axis and the  
63 ellipsoid is contracted slightly. Growth of the ellipsoid then continues in the plane orthogonal  
64 to this first axis, again until the boundary is hit. This initial ellipsoid fitting is following by a  
65 series of small random rotations, translations and dilations of the ellipsoid in an attempt to find a  
66 larger ellipsoid in the local region. These attempts end if no increase in volume of the ellipsoid is  
67 found after a user set maximum number of iterations (default 50, see (b)), or if the total number  
68 of attempts exceeds ten times the maximum iteration number. If more than half of the sampling  
69 points on the ellipsoid are outside the image boundary it is invalid, removed and ignored in  
70 further calculations.

#### 71 (ii) Assign EF to each pixel and averaging over runs

72 Once maximal ellipsoids are found for each seed point, each foreground pixel is assigned the EF  
73 value of the largest ellipsoid that contains it, or NaN (not a number) if no ellipsoids contain that  
74 pixel. One iteration of fitting ellipsoids and assigning EF to each pixel is termed a *run*.

75 Ellipsoid factor is a stochastic process and therefore results can vary from run to run. The user  
76 has the option to average the outputs over several runs to smooth the results. From experience  
77 on various real-life examples, we recommend averaging over 6 runs (the "repetitions" input  
78 parameter) for the final result generation. This typically reduces the median and maximum EF  
79 variation per pixel per run to less than 0.15 and 0.4, respectively (See supplementary material (c)).

#### 80 (iii) EF inputs and outputs

81 Some further mathematical considerations on the shape of the distributions to be expected when  
82 calculating a difference of axis ratios can be found in Supplementary Material ((d)).

83 In the present study, we ran Ellipsoid Factor on two data sets, with sample descriptions and  
84 statistical analysis detailed in the next two subsections. EF input parameters used for each of  
85 these studies are listed in Table 4. For both studies, we measured BV/TV and SMI, calculated  
86 descriptive statistics of the EF distribution (median, maximum, and minimum), and plotted EF  
87 histograms.

#### 88 (b) Disuse osteoporosis in mouse tibiae

89 X-ray microtomography (XMT) scans (5  $\mu\text{m}$  nominal pixel spacing) of 12 murine tibiae were  
90 obtained from an unrelated study [25] (in preparation). The animals had undergone sciatic

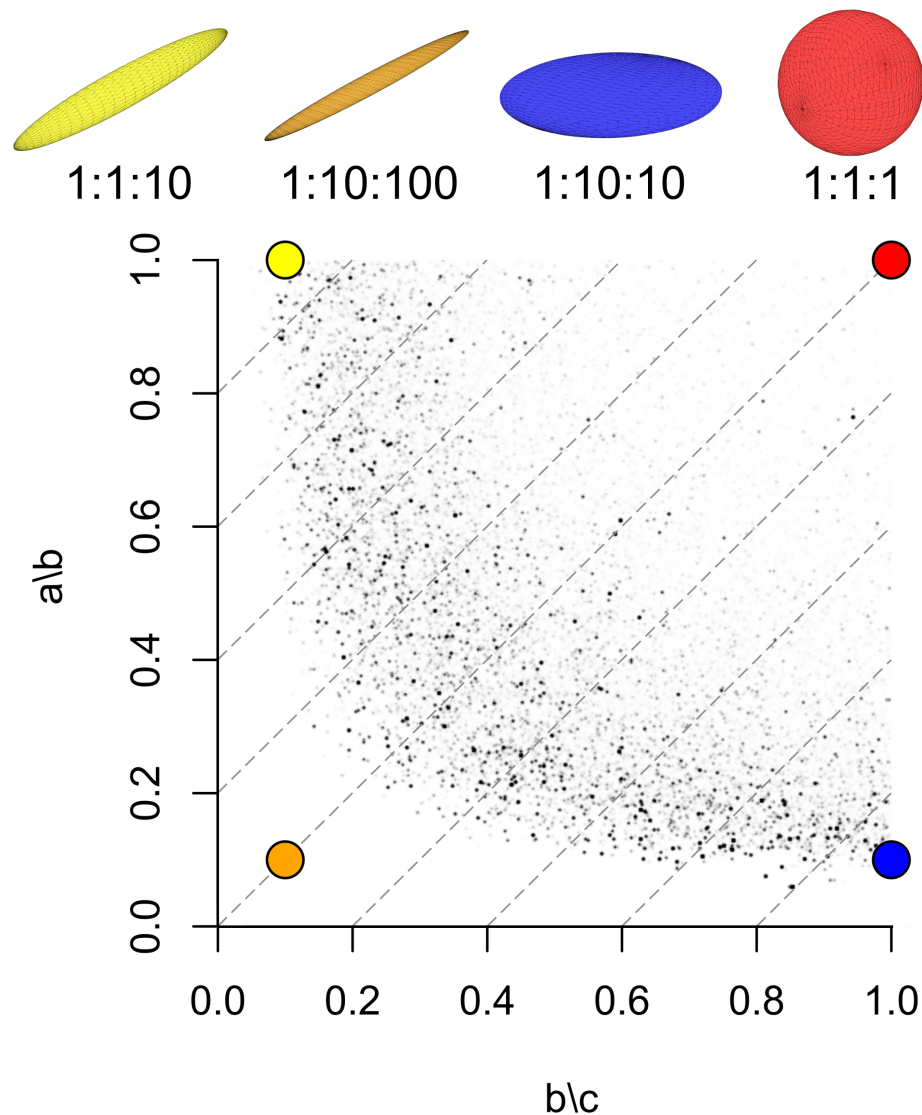

**Figure 1.** Edge cases of possible maximal ellipsoids, their axis ratios, and where a pixel within such an ellipsoid would be registered on the Flinn peak plot. Note that the orange and the red ellipsoid have the same EF, but vastly different Flinn peak point locations. Small black points are the Flinn peak plot data from the trabecular bone of a great spotted kiwi (*Apteryx hastii*) [24]. Ellipsoids with the same EF value, i.e. EF isolines, are represented by the grey, dashed diagonal lines with slope 1 on the Flinn plot.

91 neurectomy to the right hindlimb, inducing one-sided disuse osteoporosis. They were divided  
92 into three groups of four mice. Group 1,2, and 3 were euthanised 5, 35, or 65 days after surgery,  
93 respectively. Trabecular bone from the proximal metaphysis was segmented by drawing around  
94 the trabecular-cortical boundary using the software CTan (Bruker, Belgium).

95 The segmented images were denoised using a 3D median filter and thresholded at a pixel value  
96 of 75 (Figure 2). The thresholding value was selected visually as sensible on one sample and kept  
97 consistent across samples. As the EF distributions were uni-modal and not normal in all cases, the  
98 EF median, maximum and minimum were taken as representative values for each specimen. SMI  
99 values were computed for each sample (using Hildebrand and Rüegsegger's method [7] with



100 volume resampling 2 and mesh smoothing 0.5), and bone volume fraction measurements were  
101 taken from the raw data of an unrelated study [25] (in press).

102 For each group, paired t-tests comparing EF median, SMI and bone volume fraction between  
103 control and disuse leg were performed using the R software [26]. We performed Pearson's  
104 product-moment correlation tests for association between EF median and bone volume fraction,  
105 and between SMI and bone volume fraction for each group. The R scripts used for this purpose  
106 can be found in an online repository [27] under /R/paired-mouse-disuse-test.R.

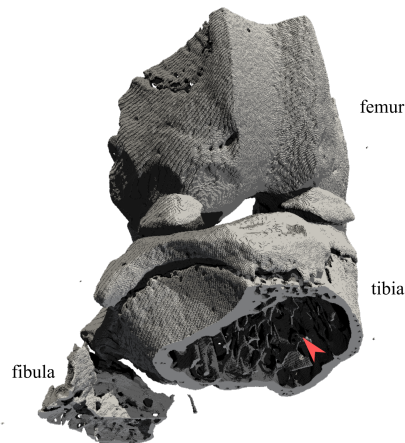

**Figure 2.** The right knee of one of the mouse samples rendered from a binary image. Red arrowhead points to the trabecular bone in the region of interest for this study. View is cranio-caudal with an oblique tilt towards proximal.

### 107 (c) Ellipsoid Factor in human vertebrae of varying trabecular bone volume 108 fraction

109 To investigate the association of SMI and EF with human bone health, we imaged sagittal sections  
110 of 22 vertebrae from women of varying age (24-88 years old) using XMT (30  $\mu\text{m}$  pixel spacing).  
111 Pixels with a linear attenuation coefficient of more than  $0.7 \text{ cm}^{-1}$  were classified as bone, others  
112 as background. Cuboidal regions of interest containing trabecular bone, aligned with the image  
113 axes, were chosen manually. The vertebrae were originally collected and prepared for imaging  
114 with scanning electron microscopy in a previous study [28]. This data set was interesting to the  
115 present study for two reasons. Firstly, these are the first EF numbers obtained on healthy and  
116 osteoporotic samples from humans. Secondly, they constitute a challenge for choosing reasonable  
117 EF input parameters because they are close to the resolution limit at which we can expect EF  
118 to fit the local shape well (trabecular thickness is approximately 5-8 pixels in these images). We  
119 additionally report mean and maximum trabecular thickness (Tb.Th [mm]) in these samples.

120 The age distribution of our vertebral samples was non-normal, as it was skewed to the left  
121 by the prevalence of older samples (Shapiro-Wilk test  $p < 0.05$ ). We therefore performed a non-  
122 parametric test of association of age with bone volume fraction. All other variables of interest (EF  
123 Median, EF Maximum, EF Mode, EF Minimum, SMI, SMI+, SMI-, mean Tr. Th., maximum Tr. Th)  
124 could be assumed to follow a normal distribution (Shapiro-Wilk test  $p > 0.05$ ). As a consequence,  
125 we used Pearson's  $r$  as a measure of association between these variables and bone volume fraction  
126 in our statistical tests. All statistical analysis of the vertebral samples was based on a custom script  
127 (available at [27] under R/histo-EF-stats-vertebrae-final.R) using the R programming  
128 language [26].

| Parameter name                    | Description                                                                                  | Default values |
|-----------------------------------|----------------------------------------------------------------------------------------------|----------------|
| Number of sampling vectors        | Number of sampling directions used to search for contacts with the boundary.                 | 100            |
| Sampling increment                | Increment for vector searching in pixel units.                                               | 1/2.3          |
| Skeleton points per ellipsoid     | Number of skeleton points per ellipsoid. Sets the granularity of the ellipsoid fields.       | 10             |
| Contact sensitivity               | Number of sampling vectors in contact with surface required to be classified as a collision. | 1              |
| Maximum iterations                | Maximum fitting iterations to try improving ellipsoid fit before stopping.                   | 50             |
| Maximum drift                     | Maximum distance ellipsoid may drift from seed point. Defaults to unit pixel diagonal length | 1              |
| Repetitions                       | Number of separate runs over which to average EF value                                       | 1              |
| Seed points (distance ridge)      | Seed ellipsoids based on the foreground distance ridge                                       | yes            |
| Seed points (topology-preserving) | Seed ellipsoids based on topology-preserving skeletonisation                                 | no             |
| Show secondary images             | Display secondary images (volume, semi-axes, axis ratios, Flinn Plot).                       | no             |
| Show convergence data             | Display convergence data for 2 runs or more.                                                 | no             |

**Table 1.** List of EF input parameter names, brief descriptions and default values, as listed in the ellipsoid factor documentation. We suggest users to record and publish their values for these parameters as well as the BoneJ version used to enhance the reproducibility of their experiment (See Table 4 for some examples). Note that although the defaults for "skeleton points/ellipsoid" and "repetitions" are 10 and 1 respectively, these values represent "good" values to get a quick overview on an example image. Once ready to run on an entire data set, we recommend setting these to 1 and 6, respectively (See Supplementary Material (c)).

|                            |                                                                                                           |
|----------------------------|-----------------------------------------------------------------------------------------------------------|
| Min EF                     | Minimum of sample EF distribution.                                                                        |
| Max EF                     | Maximum of sample EF distribution.                                                                        |
| Median EF                  | Median of sample EF distribution.                                                                         |
| Filling percentage         | Percentage of foreground filled by at least one valid ellipsoid.                                          |
| Number of ellipsoids found | Total number of valid ellipsoids fitted into trabecular foreground.                                       |
| Median change n            | Median change in EF value from run (n-1) to run (n). This indicates how well the EF algorithm converged.  |
| Maximum change n           | Maximum change in EF value from run (n-1) to run (n). This indicates how well the EF algorithm converged. |

**Table 2.** Values written by EF into the ImageJ results table. Median change n and Maximum change n values are only shown if the "Show convergence data" input box is ticked and EF is averaged over at least 2 runs.

|                 |                                                                                   |
|-----------------|-----------------------------------------------------------------------------------|
| EF image        | Image containing EF values for foreground pixels                                  |
| Seed image      | Binary image with ellipsoid seed points in foreground                             |
| Volume image    | Image containing the volume of the locally maximal ellipsoid                      |
| ID image        | Image containing the index in sorted ellipsoid list                               |
| a image         | shortest semi-axis of locally maximal ellipsoids                                  |
| b image         | intermediate semi-axis of locally maximal ellipsoids                              |
| c image         | longest semi-axis of locally maximal ellipsoids                                   |
| a/b image       | a/b semi-axis ratio image                                                         |
| b/c image       | b/c semi-axis ratio image                                                         |
| Flinn peak plot | Plot of semi-axis ratios of locally maximal ellipsoids (y-axis: a/b, x-axis: b/c) |
| Flinn plot      | Plot of semi-axis ratios of all (not necessarily maximal) ellipsoids fitted       |

**Table 3.** EF primary (above line) and secondary (below line) output images, with brief descriptions.

| study subject                | mouse tibiae | human vertebrae |
|------------------------------|--------------|-----------------|
| description in Methods       | (b)          | (c)             |
| number of vectors            | 100          | 100             |
| sampling increment           | 1/2.3        | 0.1/2.3         |
| seed points per ellipsoid    | 1            | 1               |
| contact sensitivity          | 1            | 5               |
| maximum iterations           | 50           | 50              |
| maximum drift                | 1            | 1               |
| number of runs               | 6            | 6               |
| average of largest n         | 1            | 1               |
| seed points (distance ridge) | yes          | yes             |
| seed points (topo.-preserv.) | yes          | yes             |

**Table 4.** EF input parameters used for the two case studies presented in this article.

### 129 3. Results

130 All distributions of EF observed in images of bone were uni-modal, as seen in the histograms of  
131 Figures 3 and 12. As described earlier, we used the median, maximum and minimum (and the  
132 mode, for the vertebrae) of the distribution as a representative value to describe the distributions  
133 of local shape in these images for statistical analysis.

#### 134 (a) Disuse osteoporosis in mouse tibiae

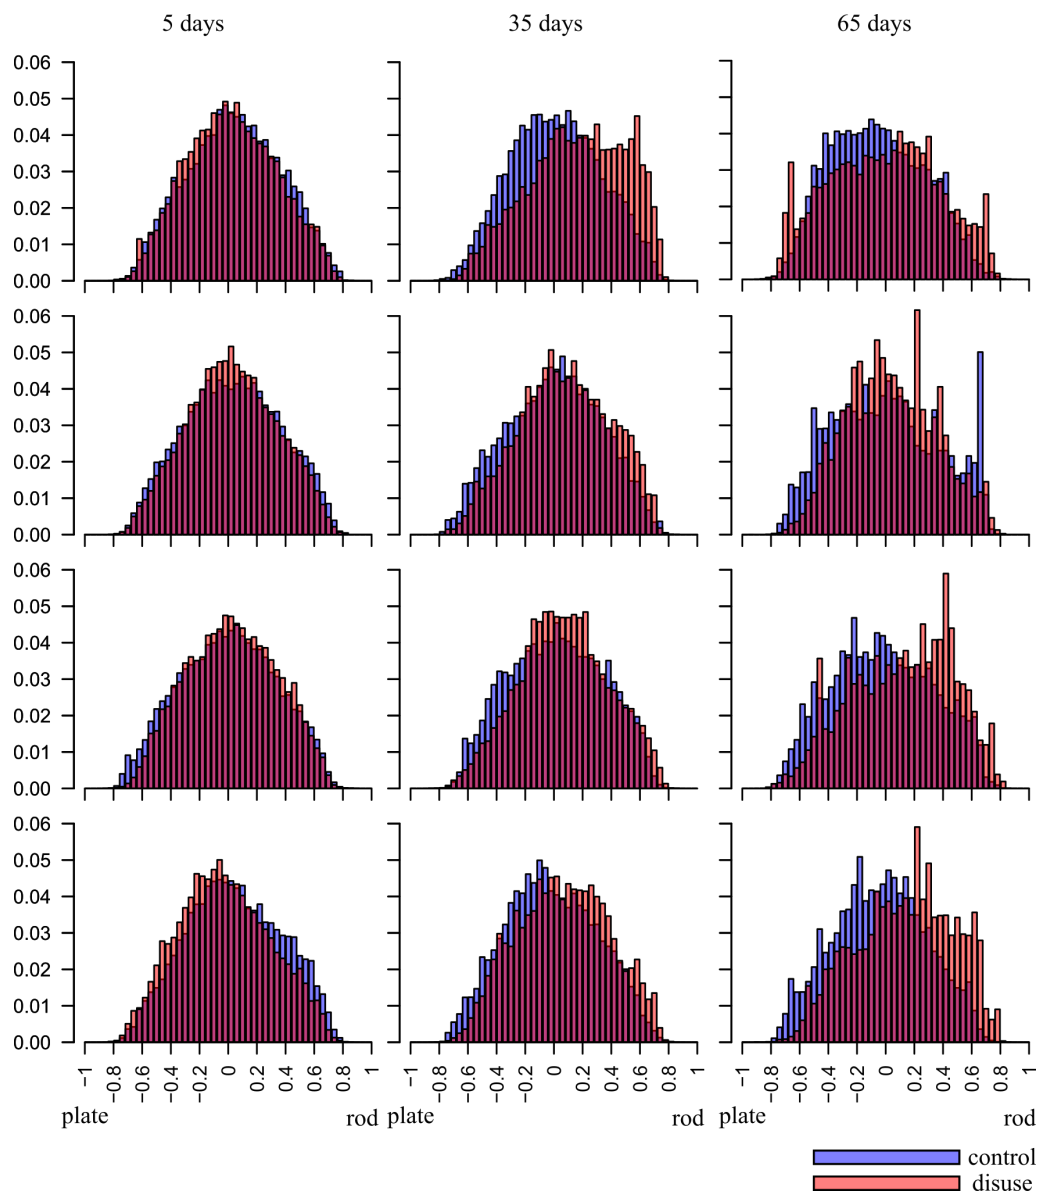

**Figure 3.** EF frequency histograms for each mouse, at 5 (left column), 35 (central column) and 65 (right column) days post-surgery. Large parts of the control (blue) and disuse (red) histograms overlap. Paired t-tests on EF median suggest a subtle plate-to-rod-transition at 35 and 65 days, but no plate-to-rod transition despite significant bone loss at 5 days.

135 Paired one-sided t-tests ( $n=4$ ) showed BV/TV and SMI values were significantly different  
136 between disuse and control limbs at the 5% level between control and disuse groups at all time  
137 points (Figures 5 and 6). Minimum and maximum EF were not statistically associated with disease  
138 state ( $p > 0.05$ ) at any time point (Figure 7). There was no link between EF median and disuse at 5  
139 days (paired one-sided t-test,  $p > 0.05$ ) and 35 days (difference not normally distributed (Shapiro-  
140 Wilk  $p < 0.05$ ), paired one-sided Wilcoxon rank sum test,  $p = 0.06$ ), but there was a statistical  
141 difference at 65 days ( $p < 0.05$ ). Unlike SMI, these measurements suggest therefore the presence  
142 of a small shift of about EF 0.1 occurred only after a large amount of bone had already been  
143 lost. Over all time points, bone volume fraction explained considerably less of the variance in  
144 EF (Pearson's  $r^2 = 0.25$ ,  $p < 0.05$ ) than SMI (Pearson's  $r^2 = -0.81$ ,  $p < 0.001$ , Figure 8). The R-  
145 script used to perform this analysis can be found under `/R/mouse-smi-tests.R` in [27]. EF  
146 images and histograms for our murine samples can be seen in Figures 4 and 3, respectively. EF  
147 filling percentage was higher than 90% for all our murine samples, although significantly differed  
148 between disuse and control at all time points (Paired t-test,  $p < 0.05$ ).

## 149 (b) Ellipsoid Factor in human vertebrae of varying trabecular bone volume 150 fraction

151 Filling percentages ranged from 74% to 97% and median change in EF between the two final runs  
152 ranged from 0.1 to 0.17 (Figure 9). Correlation tests showed that there was no association ( $p >$   
153  $0.05$ ) between bone volume fraction and any of the three convergence variables median change,  
154 maximum change and filling percentage, indicating that the EF algorithm did not preferentially  
155 fill the trabecular bone more completely or in a more stable way in samples with relatively low or  
156 high bone volume fraction. This was evidence for a satisfactory convergence of the EF algorithm,  
157 albeit not as complete as in the murine samples.

158 There was a negative association between BV/TV and age (Spearman's  $\rho = -0.58$ ,  $p = 0.004$ ),  
159 but not between BV/TV and mean or maximum trabecular thickness ( $p > 0.05$ ). SMI, SMI+ and  
160 SMI- were strongly and significantly associated with bone volume fraction: Values for Pearson's  
161  $r$  were  $-0.69$ ,  $-0.65$ , and  $-0.73$ , respectively, while  $p$ -values were all  $< 0.005$  (Figure 10). SMI  
162 ranged from 1.36 to 3.11.

163 Median, maximum and minimum EF were not associated with bone volume fraction ( $p > 0.05$ ,  
164 Figure 11), and there was a mild negative association between bone volume fraction and EF modal  
165 value ( $r = -0.45$ ,  $p = 0.03$ ). Histograms of the EF distribution were occasionally skewed in either  
166 direction across all values for bone volume fraction (Figure 12). Sometimes similar EF values  
167 clustered in one region of the vertebra, while in other cases, a range of EF values could be found  
168 in all anatomical regions considered. Figure 13 shows EF images for 20 of the 22 vertebrae we  
169 analysed.



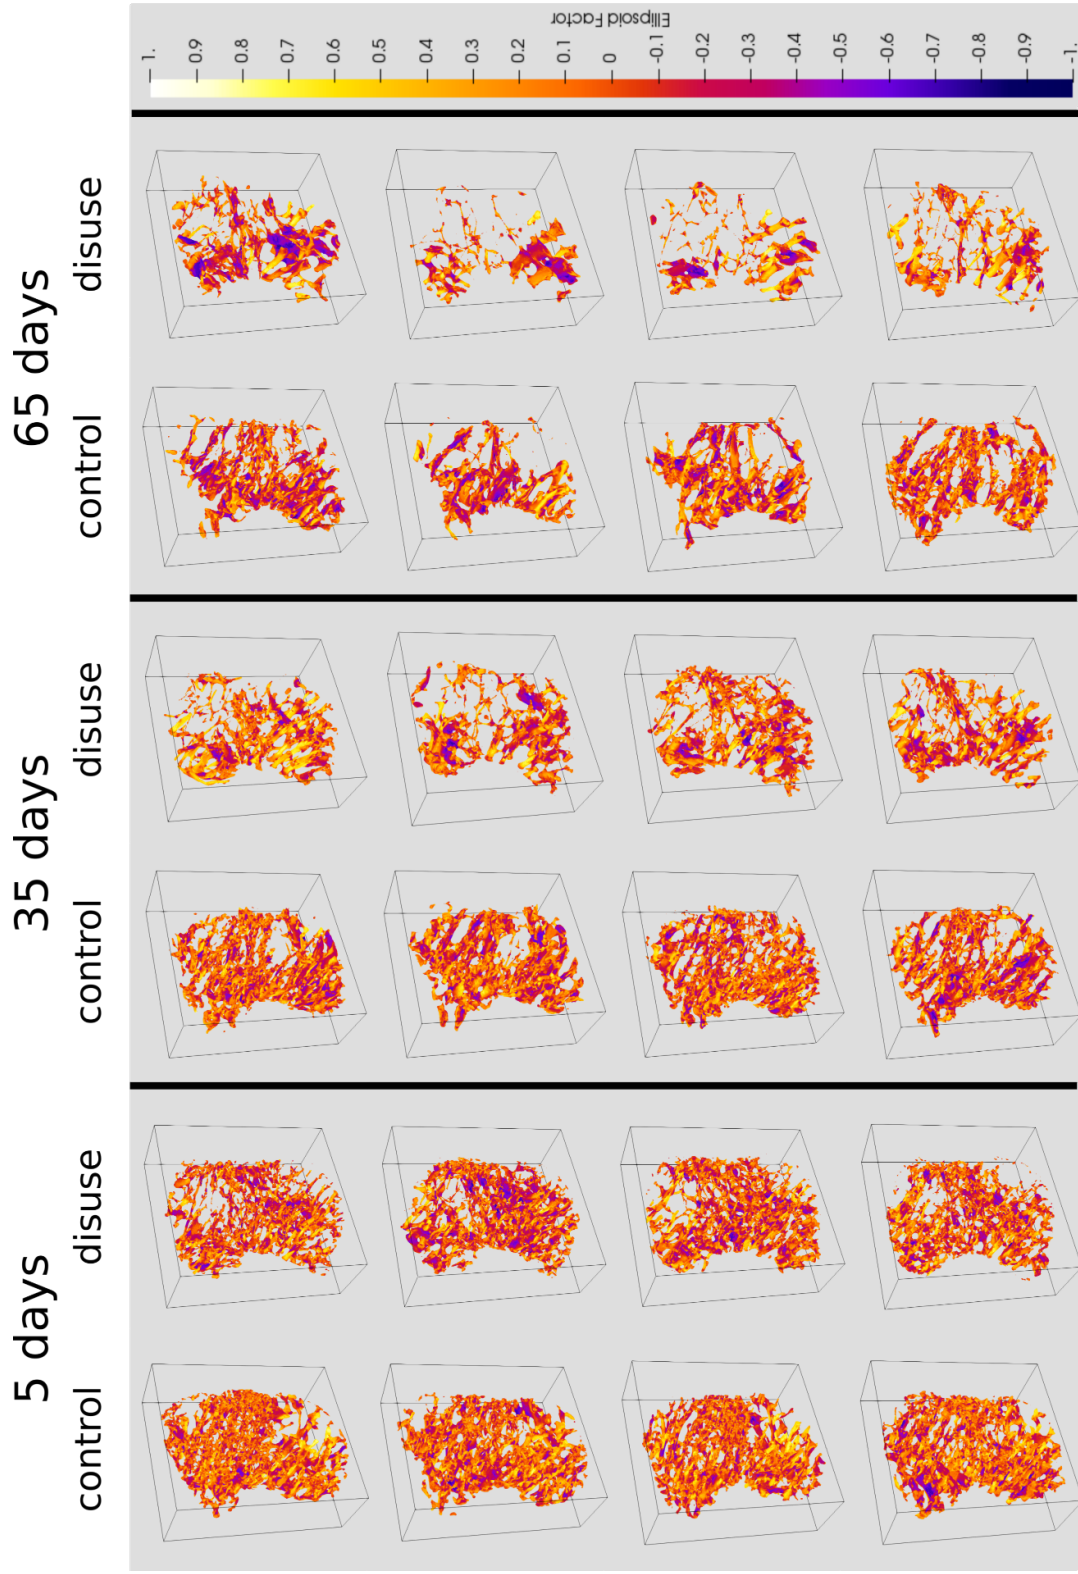

**Figure 4.** EF renders for each mouse limb over the three time points. The positive Y-direction is towards posterior and the positive z-directions is towards proximal. The X-direction is towards lateral for the control limbs, and towards medial for the disuse limbs. Bone loss appears to start medially.

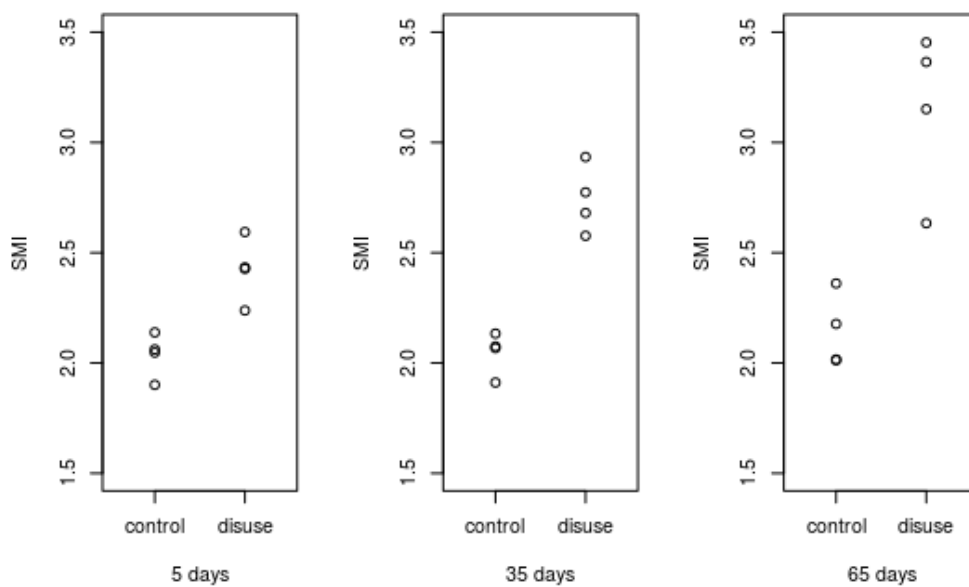

**Figure 5.** Scatter plots of SMI for each time point of either mouse limb. SMI is significantly different between control and disuse limb at all time points ( $p < 0.05$ ).

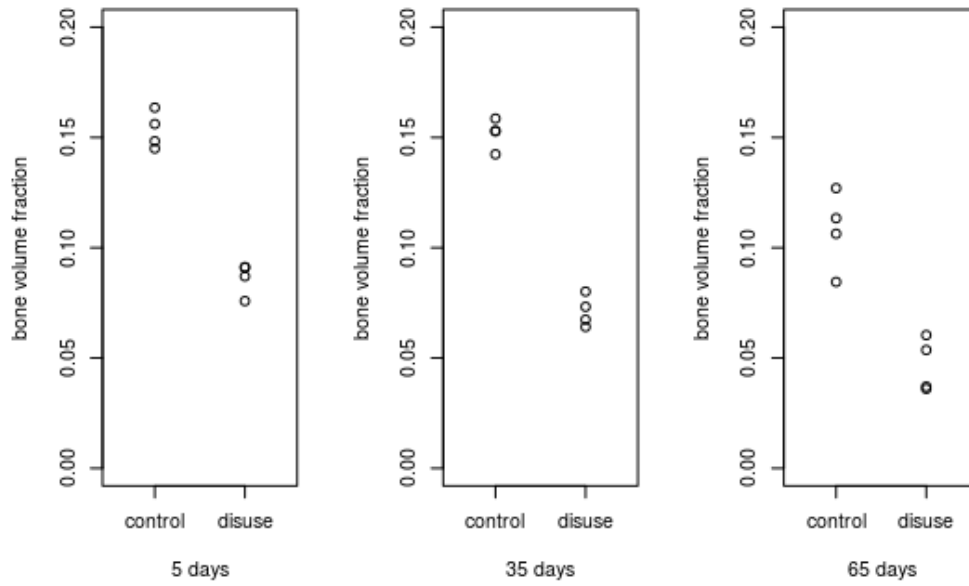

**Figure 6.** Scatter plots of bone volume fraction for each time point of either mouse limb. Bone volume fraction is significantly different between control and disuse limb at all time points ( $p < 0.05$ ).

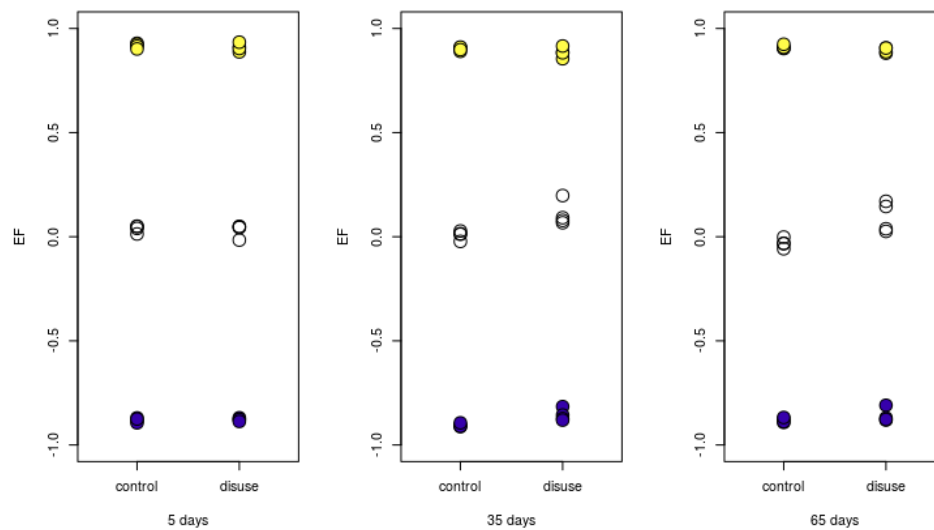

**Figure 7.** Scatter plots of EF median (white), maximum (yellow) and minimum (blue) for each time point of either mouse limb. EF median is significantly different ( $p = 0.05$ ) between disuse and healthy limbs only at the two later time points.

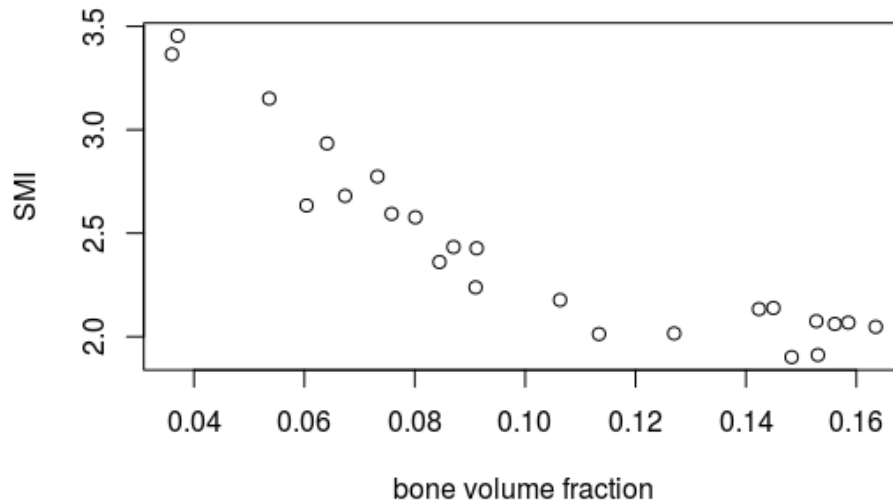

**Figure 8.** SMI value plotted against bone volume fraction in murine trabecular bone samples. Bone volume fraction and SMI values are strongly correlated (Pearson's moment-product correlation  $r = -0.9$ ,  $p < 0.001$ ).

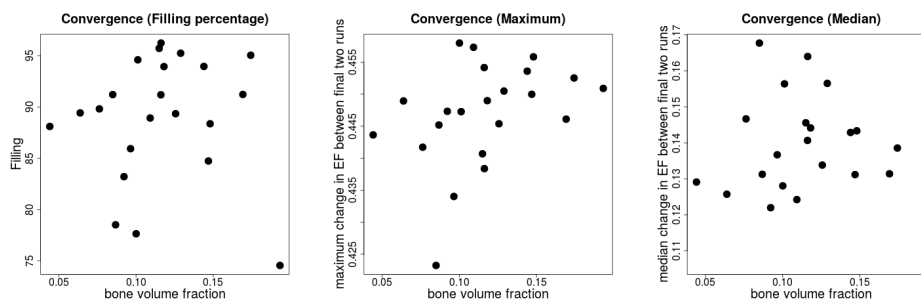

**Figure 9.** EF convergence parameters (Filling percentage, maximum and median EF change between two final runs) plotted against bone volume fraction for our human vertebral samples. There were no statistical associations between the variables, showing that all samples were equally likely to have a high filling percentage, independent of volume fraction.

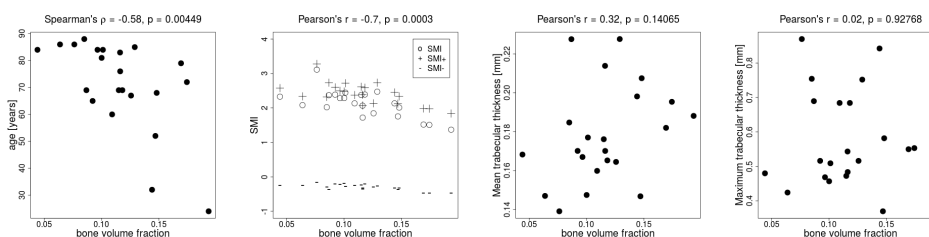

**Figure 10.** Two left images: bone volume fraction was correlated with age in our samples (Spearman's  $\rho = -0.58$ ,  $p = 0.004$ ) and SMI, SMI+ and SMI- (Pearson's  $r = -0.69$ ,  $-0.65$ , and  $-0.73$ , respectively;  $p < 0.005$ ). Two right images: mean and maximum Tr Th did not correlate with bone volume fraction ( $p > 0.05$ ).

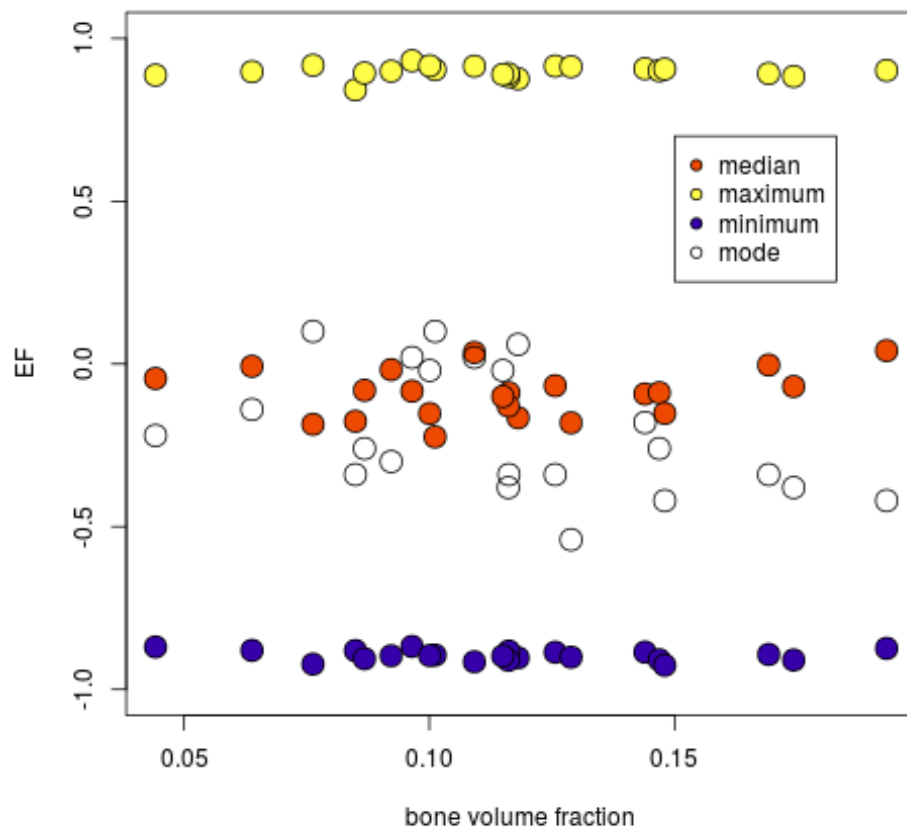

**Figure 11.** EF distribution parameters plotted against bone volume fraction in our vertebral samples. Only the mode of the distribution was mildly associated with bone volume fraction; Median, maximum and minimum were not.

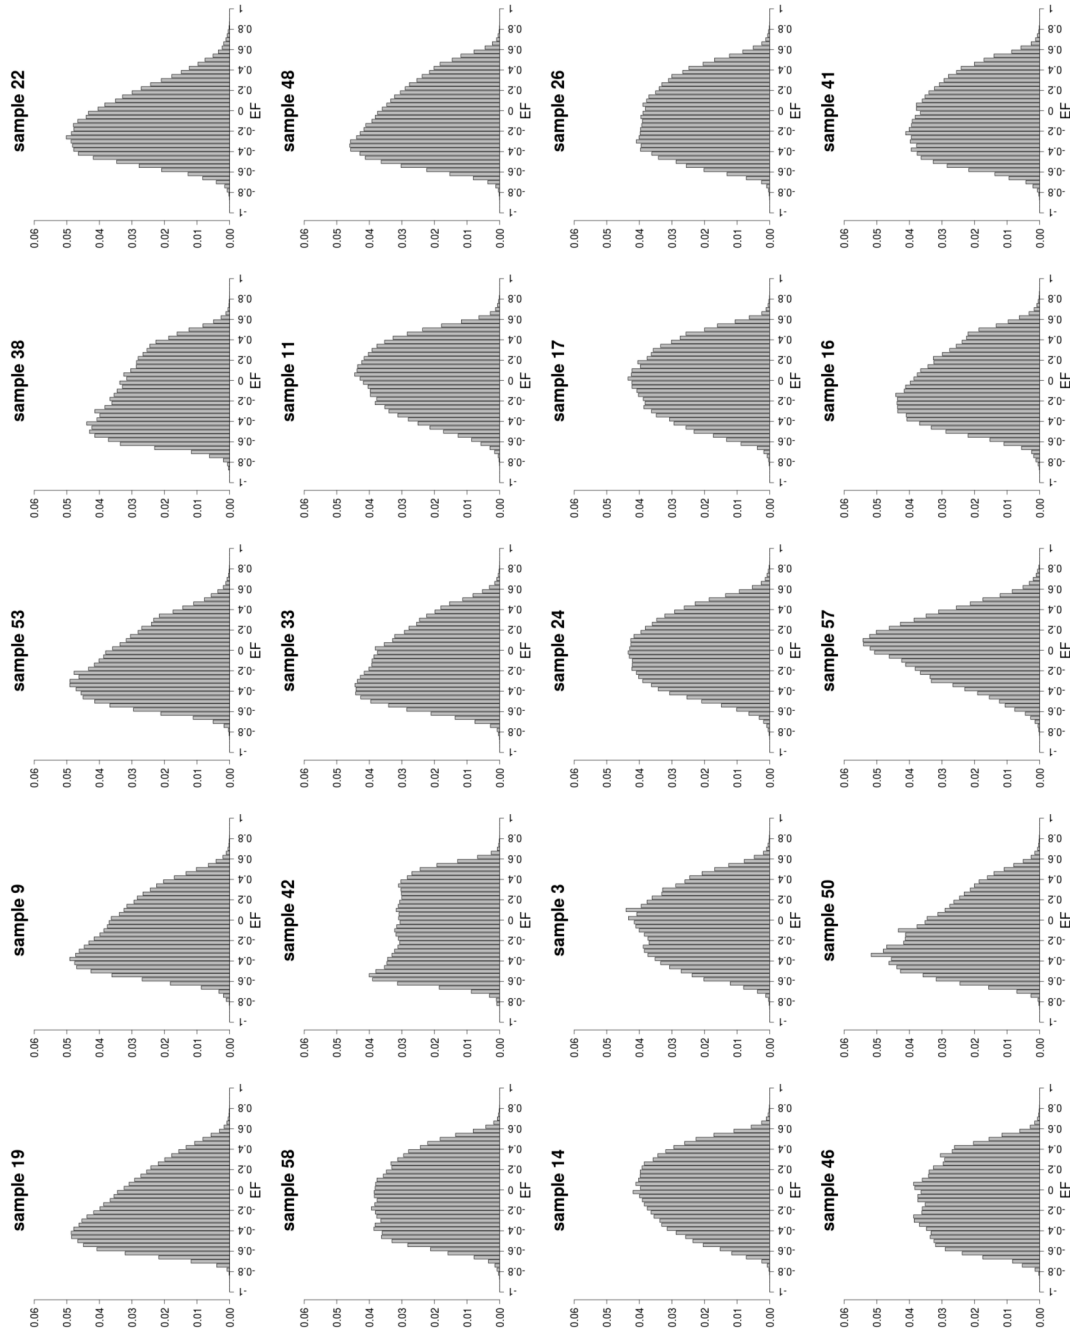

**Figure 12.** EF histograms of the vertebrae studied, sorted from top-left to bottom-right by bone volume fraction. EF histograms are all unimodal, and some skew in either direction. The mode, but not the median, of the EF distribution was associated with bone volume fraction. Samples 49 and 12 not shown.



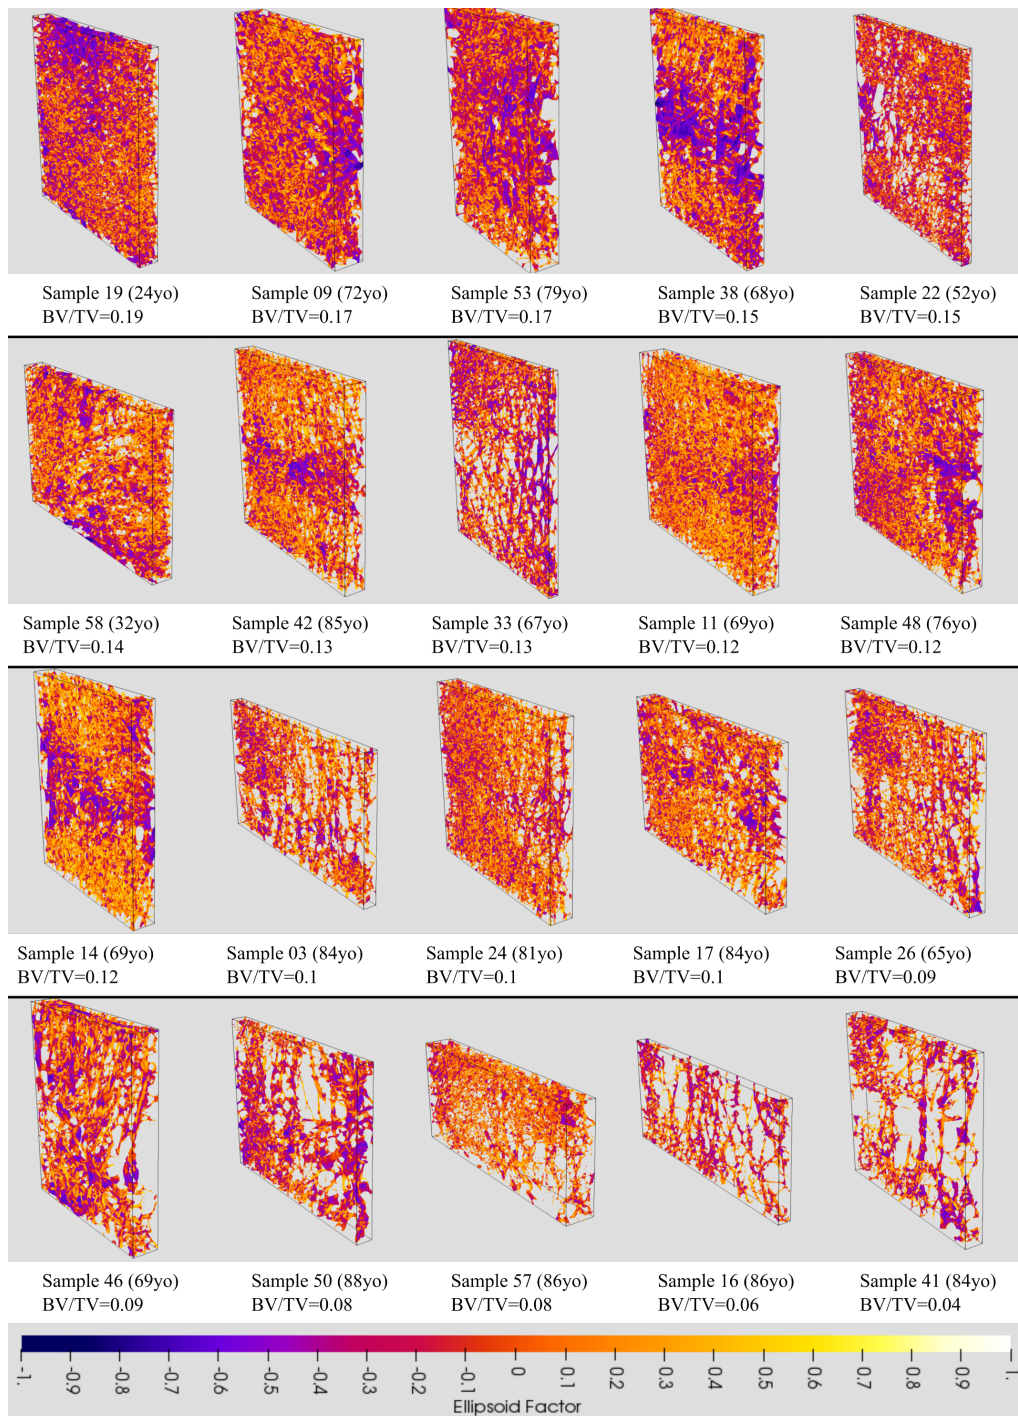

**Figure 13.** EF image renders of the vertebrae studied, sorted from top-left to bottom-right by bone volume fraction. Yellow pixels indicate a more rod-like, and blue pixels a more plate-like local shape, with orange indicating a shape on a continuum between plates and rods. All samples display a range of EF values. In some samples, pixels of similar EF value seem to cluster in the same region (e.g sample 42), while in others there seems to be a mix of EF values in all regions (e.g. sample 33). Samples 49 and 12 not shown.

## 170 4. Discussion

171 We measured Ellipsoid Factor distributions in trabecular bone from healthy and unloaded mouse  
172 tibiae and from human vertebrae. Only on some occasions, EF supported the presence of a  
173 small shift towards a more rod-like geometry linked with decreases in bone volume fraction.  
174 SMI, on the other hand, suggested the presence of a drastic plate to rod transition whenever a  
175 difference in bone volume fraction was found. EF distributions in the samples from both species  
176 we investigated in the present study were consistently uni-modal.

177 In the murine samples, bone loss happened shortly after surgery in one condyle, but EF  
178 median changed only later during disease progression. This suggests that local shape changes  
179 in the trabecular bone may be delayed with respect to the initial loss of bone. The strong  
180 interdependence between SMI and bone volume fraction is misleading in this case, as it support  
181 an immediate change in local trabecular shape that culminates into a geometry that is more  
182 convex than a perfect rod ( $SMI > 3$ ) at the latest time point. Minimum and maximum EF values  
183 are not different in healthy and osteoporotic murine samples, underlining that very plate- and  
184 very rod-like structures co-exist in all samples.

185 Similarly, in the human vertebra samples, only the mode of the distribution correlated with  
186 bone volume fraction, highlighting that any changes in local shape linked to a decrease in bone  
187 volume fraction are subtle. Considerable variability in local shape can be seen in the EF images  
188 of the vertebral samples. Some of the samples agree with the results of a descriptive anatomical  
189 study of human 4th lumbar vertebral bodies, which characterised the trabecular geometry as  
190 central plates and braces surrounded cranially and caudally by a honeycomb of rods [29].

191 In this study, we further presented some recommendations for suitable default parameters for  
192 EF (Table 1), based on the convergence behaviour of EF reported in Supplementary Material (c).

### 193 (a) What is the mechanical relevance of plates and rods in cancellous 194 bone?

195 Modelling cancellous bone as a cellular solid gave rise to the idea that plates and rods contribute  
196 to mechanical performance. Theoretical, idealised models of open-cell and closed-cell porous  
197 solids predicted a dependence of the stiffness and strength on the square and the cube of the  
198 characteristic length  $r$ , respectively. In a seminal study for the concept of rods and plates in  
199 trabecular bone, Gibson analysed previous data from this perspective and showed that these  
200 models were consistent with a transition from open-cell to closed-cell mechanical behaviour at  
201 a bone volume fraction of 0.2 [30]. This is further evidence that attempting to measure rods and  
202 plates in trabecular bone is not independent of the amount of bone present (contrary to what was  
203 stated in the original SMI study [7]). The bone volume fraction in our samples was below 20%,  
204 where the influence of concave surface and negative SMI are less than in samples with greater  
205 BV/TV [13], so it would be interesting to compare EF in samples with bone volume fraction  
206 above and below this value in the future.

207 The mechanical environment has a strong effect on bone size and shape at an organ and tissue  
208 level (e.g. [31–33], for a review, see [34]), but Frost's mechanostat may not be the main driver of  
209 trabecular adaptation within the life of an individual [5]. Across species, trabecular bone micro-  
210 structure scales as a function of animal size and is likely to behave differently in small animals  
211 compared to large animals [35]).

212 Changes in local shape may indicate preferential osteoclastic resorption and/or osteoblastic  
213 formation in certain areas of bone. Qualitative descriptions based on scanning electron  
214 micrographs of human lumbar vertebrae suggest defective and or slowed bone formation  
215 and mineralisation, as well as decoupling of resorption and formation as characteristic of the  
216 osteoporotic trabecular geometry at a length scale below the one investigated in the present  
217 study [36]. Resorption cavities in human fourth lumbar vertebrae may occur most often near  
218 trabecular nodes, with the next most common location plate-like trabeculae [37]. The study gives

219 no details on how plates, rods, nodes and "fenestrations" are characterised. It would be interesting  
220 to correlate SMI and EF results with such observational studies in the future.

## 221 (b) Measures of local shape beyond SMI and EF

222 Individual trabecula segmentation (ITS) has been proposed as a method to classify the local shape  
223 of trabecular bone as rods and plates [38]. ITS is based on a decomposition of the trabecular  
224 geometry into surfaces and curves [39], with subsequent assignment of all foreground pixels to  
225 one of these surfaces and curves based on a measure of vicinity and orientation [40]. ITS has been  
226 measured in biopsies of hip replacement patients with inter-trochanteric fractures [41]. Compared  
227 to cadaveric controls, these fracture patients had lower ITS plate bone volume fraction, but equal  
228 ITS rod bone volume fraction, as well as lower stiffness moduli and lower overall bone volume  
229 fraction (BV/TV). We find it interesting that ITS-measured plate volume fraction correlates with  
230 stiffness in these studies. However, we note that ITS-measured axial volume fraction is also (often  
231 more strongly) correlated to stiffness than plate volume fraction. It is clear that, at equal bone  
232 volume fraction, bone that is less aligned to the direction in which stiffness is measured will  
233 behave in a more compliant manner than bone that is more strongly aligned to this direction [42].  
234 We therefore suggest that, in the ITS studies, the driving factor for these observations may not  
235 be a change in local plate/rod shape, but rather a change in local alignment to the axes in which  
236 stiffness is measured. It would be interesting to compare ITS and EF results in the future.

237 Another method that decomposes trabecular bone into rods and plates was developed but  
238 validated only on piece-wise convex objects [43]. Applying it to human vertebral samples  
239 suggested that three parameters of micro-architecture (two relating to the supposed rod elements)  
240 explained 90% of bone stiffness, the same amount of variation in sample stiffness explained by  
241 apparent bone volume fraction alone [44]. However, all three of these parameters had a significant  
242 and strong correlation with bone volume fraction, and this study therefore does not constitute  
243 evidence for geometrical changes in the trabecular compartment driving mechanical properties  
244 beyond the loss of material. Fatigue failure of trabecular bone may further be related to elements  
245 oriented transversely to the main loading direction, which have little effect on stiffness and  
246 strength [45].

## 247 (c) Limitations and Future work

248 Ellipsoid Factor is a useful addition to the many geometrical and topological quantities that are  
249 routinely measured in trabecular bone, some of which depend on each other, as we have shown  
250 here. Ellipsoid Factor is at least designed to be a priori independent of bone volume fraction, the  
251 most important descriptor of trabecular bone mechanical properties [42,46]. The lengths of the  
252 ellipsoid semi-axes  $a, b, c$  as half-thickness, half-width, and half-length trabecular variables could  
253 be seen as an extension to measuring trabecular thickness alone.

254 The samples we consider in this paper are cross-sectional, which unfortunately precludes  
255 us from following the trabecular architecture of a single individual over time. Ellipsoid Factor,  
256 like all other measures of trabecular micro-architecture, requires a sufficient resolution of the  
257 individual geometrical features to minimise artefacts such as noise and partial volume effect.  
258 Where resolution is insufficient for EF to run on a binarised image, it might be possible to  
259 locate the trabecular boundary using fuzzy edge detection (and therefore circumventing the  
260 need for precise thresholding), as is done in the tensor scale algorithm [47–49]. The current EF  
261 software is designed in such a way as to make an approach based on fuzzy boundary detection  
262 straightforward. Very small trabeculae may be routinely missed by XMT altogether, but dealing  
263 with this limitation was outside the scope of this study.

264 Ellipsoid Factor is a complex algorithm, with several input parameters that need to be tailored  
265 to the application. We believe that this is also an advantage in some ways, as it will force users to  
266 better understand the methods they are using. We encourage users to ask questions can be asked  
267 on the ImageJ forum (<https://forum.image.sc/>). Despite its complexity, an advantage of EF is that

268 it reduces local shape down to a single number per pixel. Important information on the subtlety  
269 of trabecular local shape is lost due to this simplification and users are encouraged to view and  
270 interpret the Flinn peak plot because it is a more complete, but more complex, representation of  
271 the local shapes present in their sample (Figure 1). The Flinn plot may require more advanced  
272 statistics, for 2-D, non-independent response variables, to rigorously compare sampled groups. It  
273 might be possible to improve the performance of EF in the future by transferring some parallel  
274 computations onto the graphics card [50].

275 Further avenues of future research could investigating how well EF characterises curved  
276 trabecular bone, and understanding whether characteristic combinations of axis ratios  $\frac{a}{b}$  and  $\frac{b}{c}$   
277 for an individual or a group exist that are not immediately recognised by looking at the axis ratio  
278 difference.

## 279 5. Conclusion

280 Our investigations suggest that local shape in trabecular bone is not straightforward to  
281 decompose into rods and plates, and that a wealth of shapes across the plate-rod continuum exist  
282 in any sample. Our data support the presence of a slight tendency of the trabecular geometry to  
283 have higher EF in osteoporotic samples, possibly as a consequence of a cell-driven re-organisation  
284 that is delayed in respect to the initiation of bone loss. This transition, where it occurs, is  
285 considerably more subtle than SMI values suggest.

## 286 Acknowledgments

287 The authors thank Phil Salmon (Bruker Micro-CT), Andy Pitsillides (RVC) and the wider RVC  
288 Skeletal Biology Group for helpful discussions on trabecular bone, as well as Richard Domander  
289 (RVC) and Curtis Rueden (University of Wisconsin-Madison) for valuable help and support in  
290 working with ImageJ2. We also thank Yu-Mei Chang for advice with statistical analysis, and Eva  
291 Herbst for critically reading the manuscript. This research was supported by a BBSRC Project  
292 Grant to MD (BB/P006167/1).

## 293 Author contributions

294 MD had the idea for Ellipsoid Factor and designed the overall project. AAF and MD implemented  
295 the ImageJ code. AAF wrote the R and Python scripts, did the statistical analysis, made the figures,  
296 and wrote the manuscript draft. RS performed the surgery and dissected the mouse tibiae. BJ  
297 imaged the murine samples. SM segmented the trabecular compartment of the mouse tibiae, and  
298 measured bone volume fraction in the mouse samples under the guidance of BJ. DM and AB  
299 prepared and imaged the human vertebrae. All authors read the manuscript, provided feedback  
300 and approved the final version of the manuscript.

## 301 Competing interests

302 MD was a member of the Editorial Board of Royal Society Open Science at the time of submission  
303 and was not involved in the assessment of this submission.

## 304 Data availability

305 Vertebral XMT scans ([https://figshare.com/projects/Assessment\\_of\\_Bone\\_Quality\\_in\\_Osteoporosis\\_-\\_XMT\\_and\\_SEM/76962](https://figshare.com/projects/Assessment_of_Bone_Quality_in_Osteoporosis_-_XMT_and_SEM/76962)) and segmented XMT of mouse trabecular bone  
306 ([https://figshare.com/projects/Segmented\\_trabecularbone\\_from\\_microCT\\_scans\\_of\\_mice\\_with\\_one-sided\\_neurectomy\\_to\\_hindlimb/79583](https://figshare.com/projects/Segmented_trabecularbone_from_microCT_scans_of_mice_with_one-sided_neurectomy_to_hindlimb/79583)) are available on the data  
307 sharing repository figshare. Some vertebral scans can additionally be explored as 3d renderings  
308 on SketchFab: <https://sketchfab.com/alexjcb/collections/vertebrae-sections>.  
309  
310



311 The BoneJ source can be found on Github <https://github.com/bonej-org/BoneJ2>, with  
312 installation instructions at <https://imagej.net/BoneJ2#Installation>

21

## 313 Ethics

314 The image data were obtained and re-used from unrelated experiments in which animal  
315 procedures and human samples were used with appropriate ethical approval. The use of animals  
316 in the unrelated study was carried out in accordance with the Animals (Scientific Procedures) Act  
317 1986, an Act of Parliament of the United Kingdom, approved by the Royal Veterinary College  
318 Ethical Review Committee and the United Kingdom Government Home Office, and followed  
319 ARRIVE (Animal Research: Reporting of In Vivo Experiments) guidelines. Human second lumbar  
320 vertebral body samples were obtained via the European Union BIOMED I study "Assessment of  
321 Bone Quality in Osteoporosis".

## 322 References

- 323 1. Williamson S, Landeiro F, McConnell T, Fulford-Smith L, Javaid MK, Judge A, Leal J. 2017  
324 Costs of fragility hip fractures globally: a systematic review and meta-regression analysis.  
325 *Osteoporosis International* **28**, 2791–2800.
- 326 2. Weisenthal B, Chotai S, Sivaganesan A, Hills J, Devin CJ. 2018 Healthcare burden of  
327 osteoporosis. *Seminars in Spine Surgery* **30**, 2–7.
- 328 3. Kanis JA. 1996 Estrogens, the menopause, and osteoporosis. *Bone* **19**, 185S–190S.
- 329 4. Nielson CM, Marshall LM, Adams AL, LeBlanc ES, Cawthon PM, Ensrud K, Stefanick ML,  
330 Barrett-Connor E, Orwoll ES. 2011 BMI and fracture risk in older men: The osteoporotic  
331 fractures in men study (MrOS). *Journal of Bone and Mineral Research* **26**, 496–502.
- 332 5. Yang H, Xu X, Bullock W, Main RP. 2019 Adaptive changes in micromechanical environments  
333 of cancellous and cortical bone in response to in vivo loading and disuse. *Journal of*  
334 *Biomechanics* **89**, 85–94.
- 335 6. Bouxsein ML, Boyd SK, Christiansen BA, Guldberg RE, Jepsen KJ, Müller R. 2010 Guidelines  
336 for assessment of bone microstructure in rodents using micro-computed tomography. *Journal*  
337 *of Bone and Mineral Research* **25**, 1468–1486.
- 338 7. Hildebrand T, Rüegsegger P. 1997 Quantification of Bone Microarchitecture with the Structure  
339 Model Index. *Computer Methods in Biomechanics and Biomedical Engineering* **1**, 15–23.
- 340 8. Akhter MP, Lappe JM, Davies KM, Recker RR. 2007 Transmenopausal changes in the  
341 trabecular bone structure. *Bone* **41**, 111–116.
- 342 9. Borah B, Dufresne TE, Chmielewski PA, Johnson TD, Chines A, Manhart MD. 2004  
343 Risedronate preserves bone architecture in postmenopausal women with osteoporosis as  
344 measured by three-dimensional microcomputed tomography. *Bone* **34**, 736–746.
- 345 10. Glatt M, Pataki A, Evans GP, Hornby SB, Green JR. 2004 Loss of vertebral bone and mechanical  
346 strength in estrogen-deficient rats is prevented by long-term administration of zoledronic  
347 acid. *Osteoporosis International* **15**, 707–715.
- 348 11. Martín-Fernández M, Martínez E, Díaz-Curiel M, Guede D, Caeiro JR, De la Piedra C. 2014  
349 Effects of PTH (1–84) on bone quality in a validated model of osteoporosis due to androgenic  
350 deprivation. *The Aging Male* **17**, 42–50.
- 351 12. Patsch JM, Kiefer FW, Varga P, Pail P, Rauner M, Stupphann D, Resch H, Moser D,  
352 Zysset PK, Stulnig TM, Pietschmann P. 2011 Increased bone resorption and impaired bone  
353 microarchitecture in short-term and extended high-fat diet-induced obesity. *Metabolism* **60**,  
354 243–249.
- 355 13. Salmon PL, Ohlsson C, Shefelbine SJ, Doube M. 2015 Structure Model Index Does Not  
356 Measure Rods and Plates in Trabecular Bone. *Frontiers in Endocrinology* **6**.
- 357 14. Doube M. 2015 The Ellipsoid Factor for Quantification of Rods, Plates, and Intermediate  
358 Forms in 3D Geometries. *Frontiers in Endocrinology* **6**.
- 359 15. Fürst D, Senck S, Hollensteiner M, Esterer B, Augat P, Eckstein F, Schrempp A. 2017  
360 Characterization of synthetic foam structures used to manufacture artificial vertebral  
361 trabecular bone. *Materials Science and Engineering: C* **76**, 1103–1111.
- 362 16. Colombo A, Stephens NB, Tsegai ZJ, Bettuzzi M, Morigi MP, Belcastro MG, Hublin JJ. 2018  
363 Trabecular Analysis of the Distal Radial Metaphysis during the Acquisition of Crawling

- 364 and Bipedal Walking in Childhood: A Preliminary Study. *Bulletins et Mémoires de la Société*  
365 *d'Anthropologie de Paris*.
- 366 17. Coiner-Collier S, Vogel ER, Scott RS. 2018 Trabecular Anisotropy in the Primate Mandibular  
367 Condyle Is Associated with Dietary Toughness. *The Anatomical Record* **301**, 1342–1359.
- 368 18. Du J, Brooke-Wavell K, Paggiosi MA, Hartley C, Walsh JS, Silberschmidt VV, Li S.  
369 2019 Characterising variability and regional correlations of microstructure and mechanical  
370 competence of human tibial trabecular bone: An in-vivo HR-pQCT study. *Bone* **121**, 139–148.
- 371 19. Ketola JH, Karhula SS, Finnilä MAJ, Korhonen RK, Herzog W, Siltanen S, Nieminen MT,  
372 Saarakkala S. 2018 Iterative and discrete reconstruction in the evaluation of the rabbit model  
373 of osteoarthritis. *Scientific Reports* **8**, 1–10.
- 374 20. Zenyuk IV, Parkinson DY, Connolly LG, Weber AZ. 2016 Gas-diffusion-layer structural  
375 properties under compression via X-ray tomography. *Journal of Power Sources* **328**, 364–376.
- 376 21. Shum AD, Parkinson DY, Xiao X, Weber AZ, Burheim OS, Zenyuk IV. 2017 Investigating  
377 Phase-Change-Induced Flow in Gas Diffusion Layers in Fuel Cells with X-ray Computed  
378 Tomography. *Electrochimica Acta* **256**, 279–290.
- 379 22. Richard Domander, Michael Doube, Curtis Rueden, Alessandro Felder, Mark Hiner, Jan  
380 Eglinger. 2020 bonej-org/BoneJ2: styloid. .
- 381 23. Lee TC, Kashyap RL, Chu CN. 1994 Building Skeleton Models via 3-D Medial Surface/Axis  
382 Thinning Algorithms. *CVGIP: Graph. Models Image Process.* **56**, 462–478.
- 383 24. Doube M, Klosowski MM, Hutchinson J, Shefelbine SJ. 2018 X-ray microtomography images  
384 of trabecular bone from the femoral head and condyle of 18 avian, 72 mammalian and  
385 one crocodylian species.. p. 38242272154 Bytes. Artwork Size: 38242272154 Bytes Publisher:  
386 Figshare.
- 387 25. Javaheri B, Monzem S, De Souza RL, Pitsillides AA. 2020 A mouse model of disuse by sciatic  
388 neuroectomy saturates longer in trabecular than cortical bone and deteriorates the cortex along  
389 the entire tibial length. (*in preparation*).
- 390 26. R Core Team R: A language and environment for statistical computing. [https://www.R-](https://www.R-project.org/)  
391 [project.org/](https://www.R-project.org/).
- 392 27. Felder A. 2019 alessandrofelder/EF-helper-scripts: add null case (zenodo). .
- 393 28. Boyde A, Jones SJ. 1995 Assessment of Quality of Bone in Osteoporosis: BIOMED I Project.  
394 *Clinical Rheumatology* **14**, 596–602.
- 395 29. Jayasinghe J, Jones S, Boyde A. 1994 Three-dimensional photographic study of cancellous  
396 bone in human fourth lumbar vertebral bodies. *Anatomy and Embryology* **189**.
- 397 30. Gibson L. 1985 The mechanical behaviour of cancellous bone. *Journal of Biomechanics* **18**, 317–  
398 328.
- 399 31. Lanyon LE. 1972 In vivo bone strain recorded from thoracic vertebrae of sheep. *Journal of*  
400 *biomechanics* **5**, 277IN7279–278IN8281.
- 401 32. De Souza RL, Matsuura M, Eckstein F, Rawlinson SCF, Lanyon LE, Pitsillides AA. 2005  
402 Non-invasive axial loading of mouse tibiae increases cortical bone formation and modifies  
403 trabecular organization: A new model to study cortical and cancellous compartments in a  
404 single loaded element. *Bone* **37**, 810–818.
- 405 33. Carriero A, Pereira A, Wilson A, Castagno S, Javaheri B, Pitsillides A, Marenzana M,  
406 Shefelbine S. 2018 Spatial relationship between bone formation and mechanical stimulus  
407 within cortical bone: Combining 3D fluorochrome mapping and poroelastic finite element  
408 modelling. *Bone Reports* **8**, 72–80.
- 409 34. Meakin LB, Price JS, Lanyon LE. 2014 The Contribution of Experimental *in vivo* Models to  
410 Understanding the Mechanisms of Adaptation to Mechanical Loading in Bone. *Frontiers in*  
411 *Endocrinology* **5**.
- 412 35. Doube M, Klosowski MM, Wiktorowicz-Conroy AM, Hutchinson JR, Shefelbine SJ. 2011  
413 Trabecular bone scales allometrically in mammals and birds. *Proceedings of the Royal Society*  
414 *B: Biological Sciences* **278**, 3067–3073.
- 415 36. Jayasinghe JAP, Jones SJ, Boyde A Scanning electron microscopy of human lumbar vertebral  
416 trabecular bone surfaces. p. 10.
- 417 37. Goff MG, Slyfield CR, Kummari SR, Tkachenko EV, Fischer SE, Yi YH, Jekir MG, Keaveny TM,  
418 Hernandez CJ. 2012 Three-dimensional characterization of resorption cavity size and location  
419 in human vertebral trabecular bone. *Bone* **51**, 28–37.
- 420 38. Liu XS, Sajda P, Saha PK, Wehrli FW, Beville G, Keaveny TM, Guo XE. 2008 Complete  
421 Volumetric Decomposition of Individual Trabecular Plates and Rods and Its Morphological



- 422 Correlations With Anisotropic Elastic Moduli in Human Trabecular Bone. *Journal of Bone and*  
423 *Mineral Research* **23**, 223–235.
- 424 39. Saha PK, Chaudhuri BB, Dutta Majumder D. 1997 A new shape preserving parallel thinning  
425 algorithm for 3D digital images. *Pattern Recognition* **30**, 1939–1955.
- 426 40. Liu XS, Sajda P, Saha PK, Wehrli FW, Guo XE. 2006 Quantification of the Roles of  
427 Trabecular Microarchitecture and Trabecular Type in Determining the Elastic Modulus  
428 of Human Trabecular Bone. *Journal of Bone and Mineral Research* **21**, 1608–1617. \_eprint:  
429 <https://asbmr.onlinelibrary.wiley.com/doi/pdf/10.1359/jbmr.060716>.
- 430 41. Wang J, Zhou B, Parkinson I, Thomas CDL, Clement JG, Fazzalari N, Guo XE. 2013 Trabecular  
431 Plate Loss and Deteriorating Elastic Modulus of Femoral Trabecular Bone in Intertrochanteric  
432 Hip Fractures. *Bone Research* **1**, 346–354.
- 433 42. Musy SN, Maquer G, Panyasantisuk J, Wandel J, Zysset PK. 2017 Not only stiffness, but also  
434 yield strength of the trabecular structure determined by non-linear  $\mu$ FE is best predicted by  
435 bone volume fraction and fabric tensor. *Journal of the Mechanical Behavior of Biomedical Materials*  
436 **65**, 808–813.
- 437 43. Stauber M, Müller R. 2006 Volumetric spatial decomposition of trabecular bone into rods and  
438 plates—A new method for local bone morphometry. *Bone* **38**, 475–484.
- 439 44. Stauber M, Rapillard L, Lenthe GHV, Zysset P, Müller R. 2006 Importance of Individual Rods  
440 and Plates in the Assessment of Bone Quality and Their Contribution to Bone Stiffness. *Journal*  
441 *of Bone and Mineral Research* **21**, 586–595.
- 442 45. Torres AM, Trikanad AA, Aubin CA, Lambers FM, Luna M, Rimnac CM, Zavattieri P,  
443 Hernandez CJ. 2018 Bone-Inspired Microarchitected Materials with Enhanced Fatigue Life.  
444 *bioRxiv* p. 494633.
- 445 46. Maquer G, Musy SN, Wandel J, Gross T, Zysset PK. 2015 Bone Volume Fraction and Fabric  
446 Anisotropy Are Better Determinants of Trabecular Bone Stiffness Than Other Morphological  
447 Variables. *Journal of Bone and Mineral Research* **30**, 1000–1008.
- 448 47. Saha PK, Wehrli FW. 2004 A robust method for measuring trabecular bone orientation  
449 anisotropy at in vivo resolution using tensor scale. *Pattern Recognition* **37**, 1935–1944.
- 450 48. Xu Z, Saha PK, Dasgupta S. 2012 Tensor scale: An analytic approach with efficient  
451 computation and applications. *Computer Vision and Image Understanding* **116**, 1060–1075.
- 452 49. Saha PK, Liu Y, Chen C, Jin D, Letuchy EM, Xu Z, Amelon RE, Burns TL, Torner JC, Levy  
453 SM, Calarge CA. 2015 Characterization of trabecular bone plate-rod microarchitecture using  
454 multirow detector CT and the tensor scale: Algorithms, validation, and applications to pilot  
455 human studies: Trabecular bone plate-rod microarchitecture using MD-CT. *Medical Physics* **42**,  
456 5410–5425.
- 457 50. Haase R, Royer LA, Steinbach P, Schmidt D, Dibrov A, Schmidt U, Weigert M, Maghelli N,  
458 Tomancak P, Jug F, Myers EW. 2020 CLIJ: GPU-accelerated image processing for everyone.  
459 *Nature Methods* **17**, 5–6.
- 460 51. Rueden CT, Schindelin J, Hiner MC, DeZonia BE, Walter AE, Arena ET, Eliceiri KW. 2017  
461 ImageJ2: ImageJ for the next generation of scientific image data. *arXiv:1701.05940 [cs, q-bio]*.  
462 arXiv: 1701.05940.
- 463 52. Domander R, Doube M, Rueden C, Felder A, Hiner M, Eglinger J. 2018 Bonej-Org/Bonej2:  
464 Cuneiform Experimental Patch2. .
- 465 53. Boutroy S, Bouxsein ML, Munoz F, Delmas PD. 2005 *In Vivo* Assessment of Trabecular Bone  
466 Microarchitecture by High-Resolution Peripheral Quantitative Computed Tomography. *The*  
467 *Journal of Clinical Endocrinology & Metabolism* **90**, 6508–6515.
- 468 54. Saha PK, Xu Y, Duan H, Heiner A, Liang G. 2010 Volumetric Topological Analysis: A Novel  
469 Approach for Trabecular Bone Classification on the Continuum Between Plates and Rods.  
470 *IEEE Transactions on Medical Imaging* **29**, 1821–1838.
- 471 55. Bischoff S, Kobbelt L. 2002 Ellipsoid decomposition of 3D-models. In *3D Data Processing*  
472 *Visualization and Transmission, 2002. Proceedings. First International Symposium on* pp. 480–488.  
473 IEEE.

## 474 Supplementary material

24

### 475 (a) Implementation and software design

476 Results presented in this study were obtained with a development version of BoneJ (commit  
477 0ce1c5eba). We have verified that the differences obtained with the initial "styloid" release of BoneJ  
478 [22] are approximately 0.15 on average, which is what is to be expected from the stochasticity of  
479 the EF algorithm.

480 The latest Ellipsoid Factor implementation adheres to the principles of modern ImageJ -  
481 ImageJ2 [51], dividing the the execution of the algorithm into small, modular and re-usable  
482 part ("ops", in our case: seed-point finding, ellipsoid fitting ) combined into a high-level ImageJ  
483 plugin ("command", in our case, the Ellipsoid Factor command, part of BoneJ2 [52]). Installation  
484 instructions for BoneJ2 can be found at <https://imagej.net/BoneJ2#Installation>.

485 The modularity of the seed point finding allows easy switching between the two existing  
486 seed point finding strategies (distance-ridge-based and topology-preserving). Similarly, the  
487 modularity of ellipsoid fitting allows future extension to e.g. fuzzy edge detection of trabecular  
488 surface points on low-resolution grey scale images (which may be relevant for *in-vivo* HR-  
489 pQCT images of human trabecular bone with (comparatively) low resolution [53]; for a related  
490 algorithm, see [47,49,54]) or a surface-based ellipsoid fitting strategy [55].

491 The two modules are decoupled from each other, so a change in one will not affect the usability  
492 of the other.

### 493 (b) Sensitivity to max iteration parameter

494 Figure S1 shows that the difference in EF for different values of "max iterations" was small (other  
495 input parameters being equal). Numerical experiments showed that for the emu and shrew test  
496 images, an ellipsoid that had not improved its volume for approximately 40 iterations was equally  
497 likely to not be fitted well than it was to be fitted well. We therefore chose 50 as a reasonable,  
498 conservative default value for "max iterations".

### 499 (c) Sensitivity to some input parameters

500 We tested the sensitivity of the EF image on variations in number of seeds (skip ratio), volume-  
501 weighted averaging, number of sampling vectors and number of runs. This was done on three  
502 test images, already used in the previous EF study [14]. The tests showed consistently that adding  
503 more seeds was important to achieve a high filling percentage, and that an increased number of  
504 runs (about 6) was necessary for good convergence (median change per run < 0.1). More seeds  
505 and more runs come at the cost of a longer run-time, however. We therefore recommend setting a  
506 low skip-ratio and averaging over 6 runs to users for EF experiments once they are satisfied with  
507 the other settings.

### 508 (d) Some mathematical considerations on Ellipsoid Factor

#### 509 (i) How is a difference of ratios of sorted random variable triplets distributed?

510 As seen in the main document text, EF is calculated as the difference of sorted axis ratios of the  
511 fitted ellipsoids. The ellipsoid fitting is stochastic, which means that the ellipsoid axis lengths  
512 will be randomly distributed, but their distribution is *a priori* unclear. It may therefore be useful  
513 to know how the difference of ratios of sorted random triplets is distributed for some known  
514 defined random distributions: the normal distribution (Figure S5) and the uniform distribution  
515 (Figure S6).

516 These simple examples caution against the undiscerning interpretation of EF values. However,  
517 it seems unlikely that  $a,b,c$  follow either of the distributions above. We can simulate this to an

518 extent with a gamma distribution (Figure S7). This also shows that EF values distribute in an  
519 approximately triangular fashion.

520 Finally, we expect that a structure clearly divisible into rod and plate like parts would have the  
521 properties displayed in Figure S8, i.e. the middle radius clustering into two clusters near where  
522 the smallest radius and the largest radius are clustered.

523 This subsection shows that one difference of sorted ratio distribution does not imply a unique  
524 underlying ellipsoid distribution: we have seen two ways of getting triangular distributions. It  
525 also tells us that one way of getting a bimodal distribution is have bimodal axis ratios.

526 The R script used to perform these numerical experiments and plot their results can be found  
527 at [27] under /R/null-case-EF.R.

### 528 (ii) Non-uniqueness of EF

529 Note that this locally maximal ellipsoid is not unique. For example, theoretically, one could have  
530 two axis-aligned ellipsoids with (x,y,z)-axis lengths of (1,1,9) and (3,3,1) respectively. Both would  
531 have volume 9, but very different EF. Assuming these ellipsoids are locally maximal, pixels within  
532 the first ellipsoid would have  $EF = 1 - \frac{1}{9} = \frac{8}{9}$  (i.e. rod-like) whereas pixels within the other would  
533 have  $EF = \frac{1}{3} - 1 = -2/3$  (i.e. rather plate-like (Figure S9)). The pixels in the intersection of the two  
534 ellipsoid would have non-unique EF.

### 535 (iii) Sensitivity to some more input parameters

536 [ht] We used vertebral sample 57 to investigate how the sampling increment ("step"), the contact  
537 sensitivity and a semi-axis length filter (see next paragraph) affected the EF distribution. The  
538 results are for contact sensitivity values of 1 and 5 are shown in Figure S10 and S11, respectively.

539 Small ellipsoids may get caught within a thin feature when growing, especially when the  
540 step-size is close to some stair-case-like feature and the contact-sensitivity is low (Supplementary  
541 Material iii). For this reason, we built an option to remove ellipsoids whose longest semi-axis  $c$  is  
542 smaller than a user-defined threshold (in pixel units, but does not have to be an integer number)  
543 into our code. We refer to this as the minimum valid longest semi-axis length filter.

544 We observed that at contact sensitivity 5 S11, reducing the step size was enough to remove  
545 spurious small ellipsoids, and using larger filters did not really affect the EF distribution. We  
546 therefore removed the minimum valid longest semi-axis filter in the interest of reducing an  
547 already high number of input parameters, and ran the vertebral measurements with contact  
548 sensitivity 5 and the lowest step size.

## Shrew difference histograms

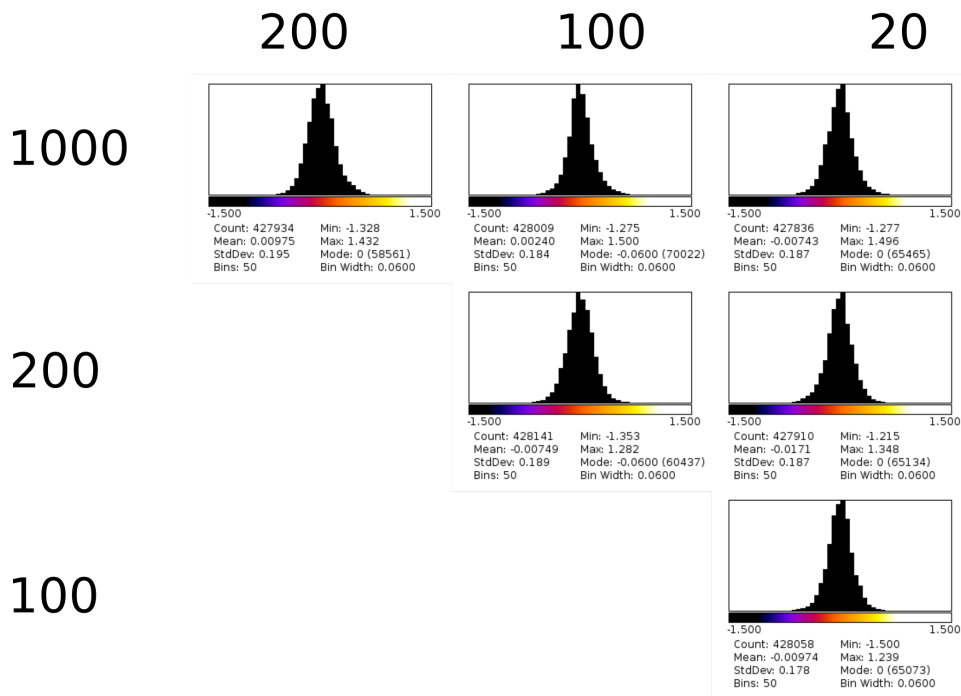

## Emu difference histograms

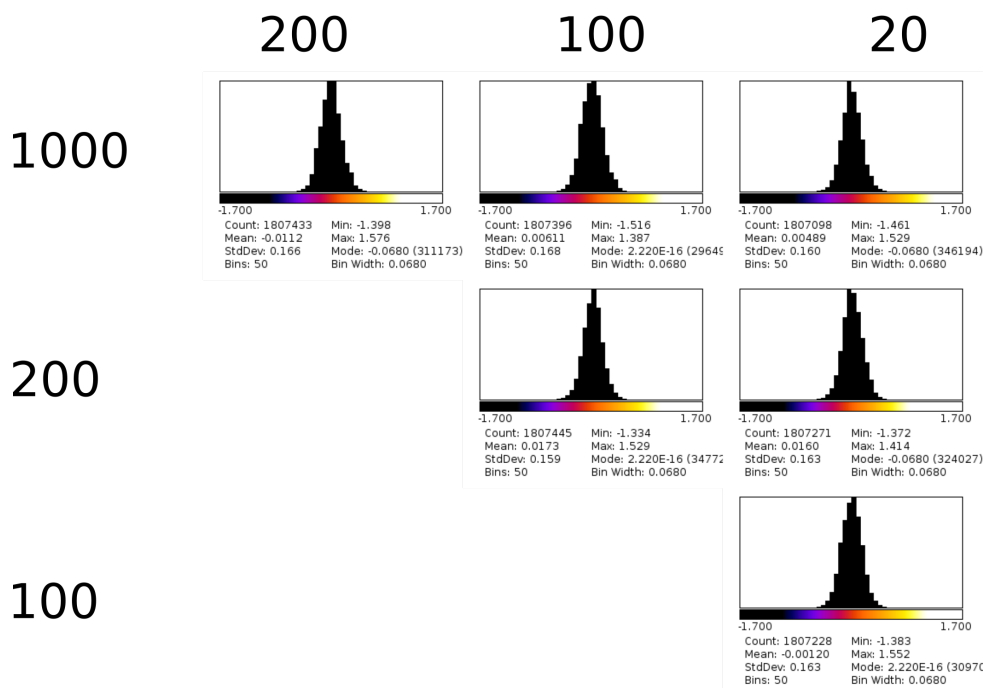

**Figure S1.** Histograms of the difference between EF outputs for the "max iteration" value on the x and on the y axis. A higher "max iteration value" did not alter the EF distribution much.

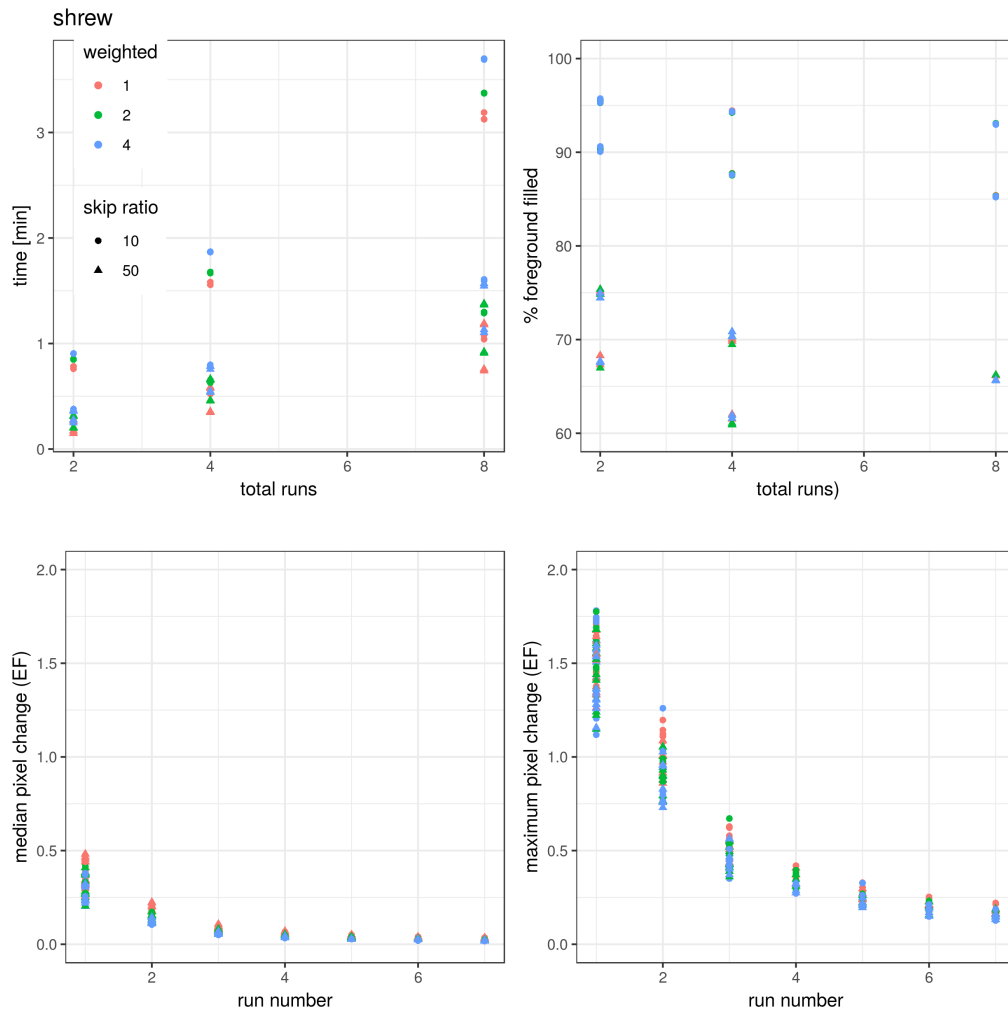

**Figure S2.** Convergence parameter sensitivity of the shrew test image to variation in skip ratio (shape of symbols), volume-weighted average over several local ellipsoids (colour), the number of vectors (10 and 100 were run, distinguishable only by location on plot) and the number of runs averaged over (x-axis). Within run volume-weighted averaging had little effect on any convergence parameter. Skipping over 5 times more seeds reduced the run-time of the algorithm by roughly a factor of 2, but reduced the filling percentage by 15-20%. Increasing the number of sampling vectors roughly doubles the run-time, and increases the filling percentage by about 5%. Median and maximum changes per additional run in EF value per pixel required 6 runs to be less than 0.1 and 0.4 respectively, which we defined as satisfactorily converged. These statements are also true for two other test images, emu (Figure S3) and rods\_plates (Figure S4).

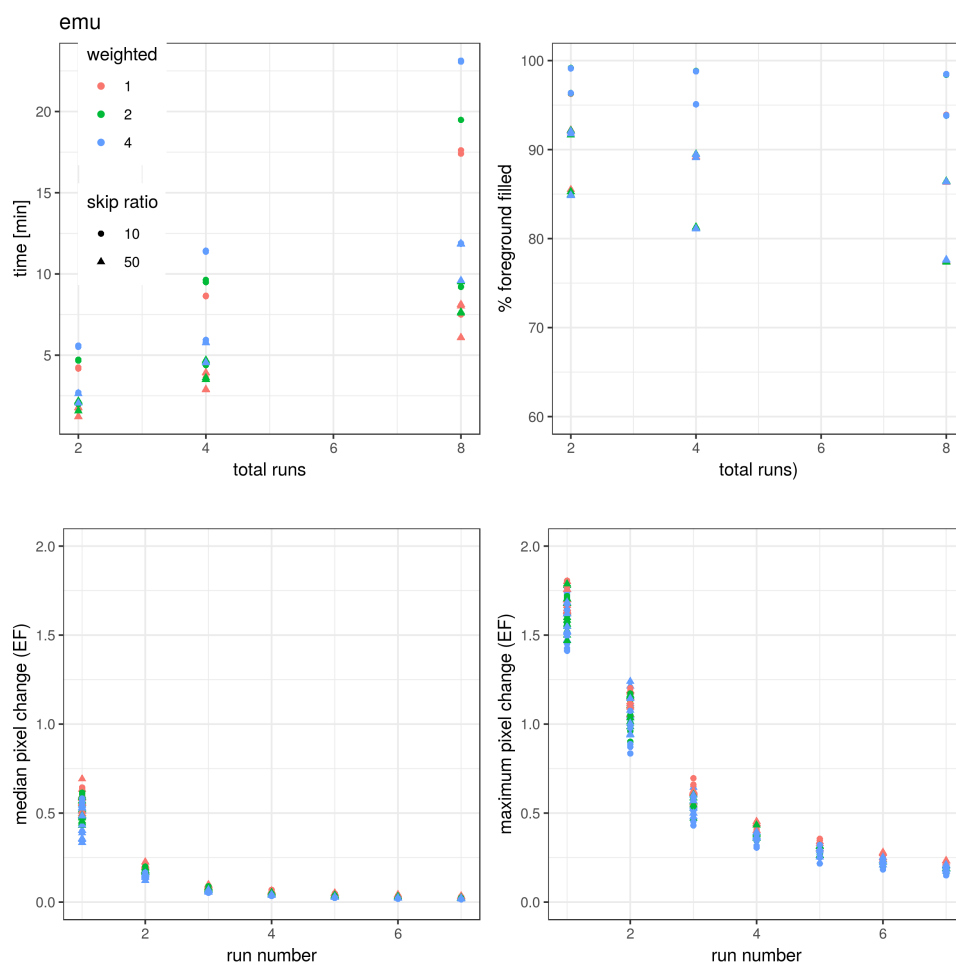

Figure S3. Please refer to the caption of Figure S2.



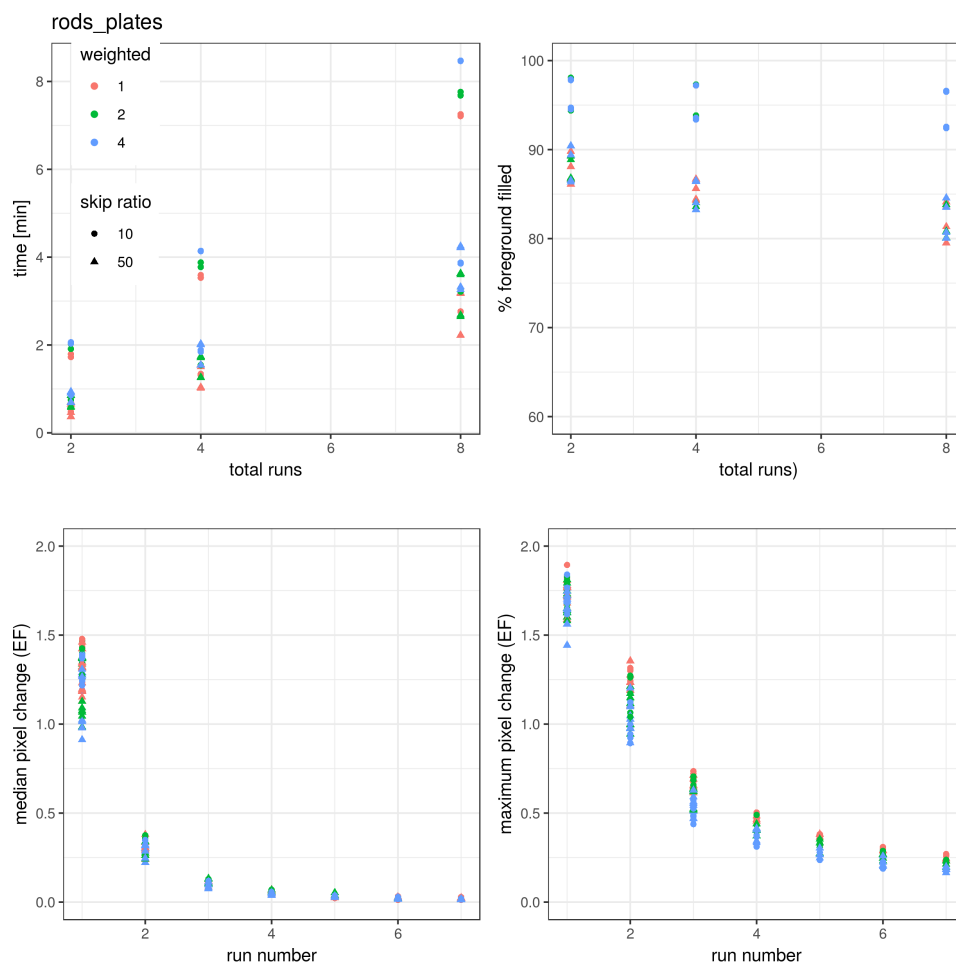

Figure S4. Please refer to the caption of Figure S2.

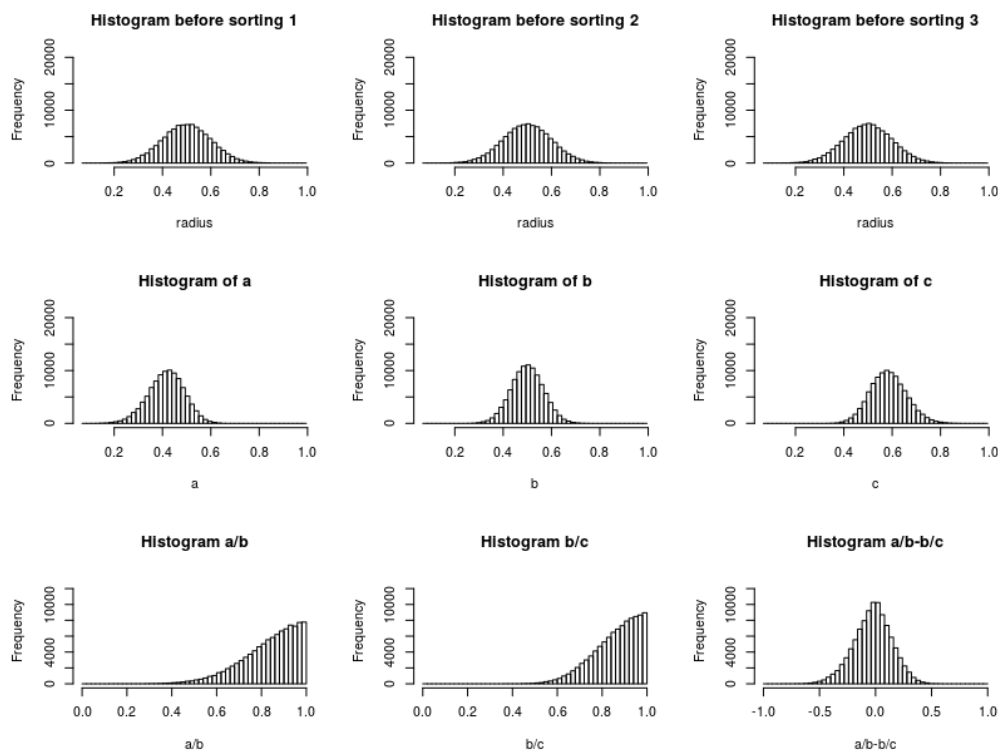

**Figure S5.** Numerical experiment with normally distributed radii (mean=0.5, standard deviation=0.1) (first row). Sorting causes  $a$  to have a lower mean, and  $c$  to have a higher mean (second row). The ratio of sorted, normally distributed triplets is heavily skewed to the left. The difference of sorted ratios appears triangular (third row).

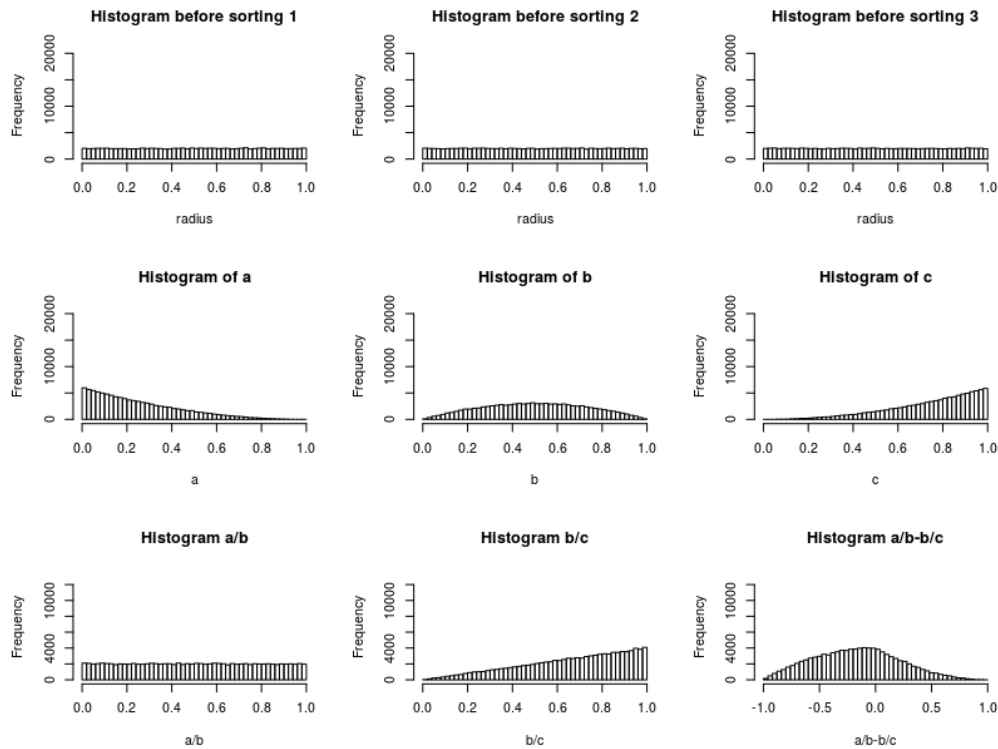

**Figure S6.** Numerical experiment with uniformly distributed radii on  $[0, 1]$  (first row). Sorting causes  $a$  to be heavily skewed to the right,  $b$  to be distributed according to what resembles a parabola and  $c$  to be heavily skewed to the left (second row). The ratio of sorted, uniformly distributed triplets is either uniformly distributed ( $a/b$ ) or heavily skewed to the left ( $b/c$ ) depending on whether the larger radius is in the numerator or the denominator. The difference of sorted ratios resembles a shark fin, and is skewed to the right.

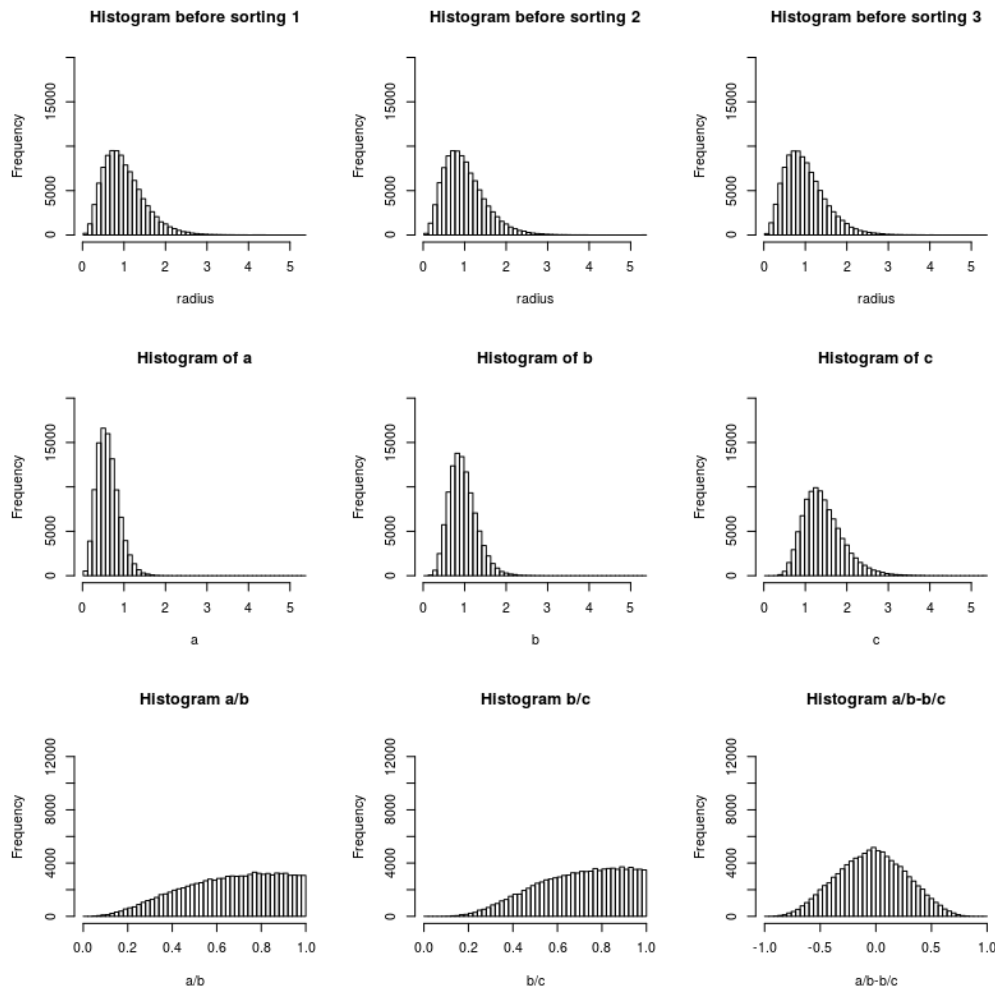

**Figure S7.** Numerical experiment with radii according to  $\text{Gamma}(k=4, \theta=1)/4$  (first row). Sorting causes the median of  $a$  to decrease, and the median of  $c$  to increase, but the distribution shape stays the same (second row). The ratio of sorted, gamma-distributed triplets is heavily skewed to the left and their difference appears triangular.

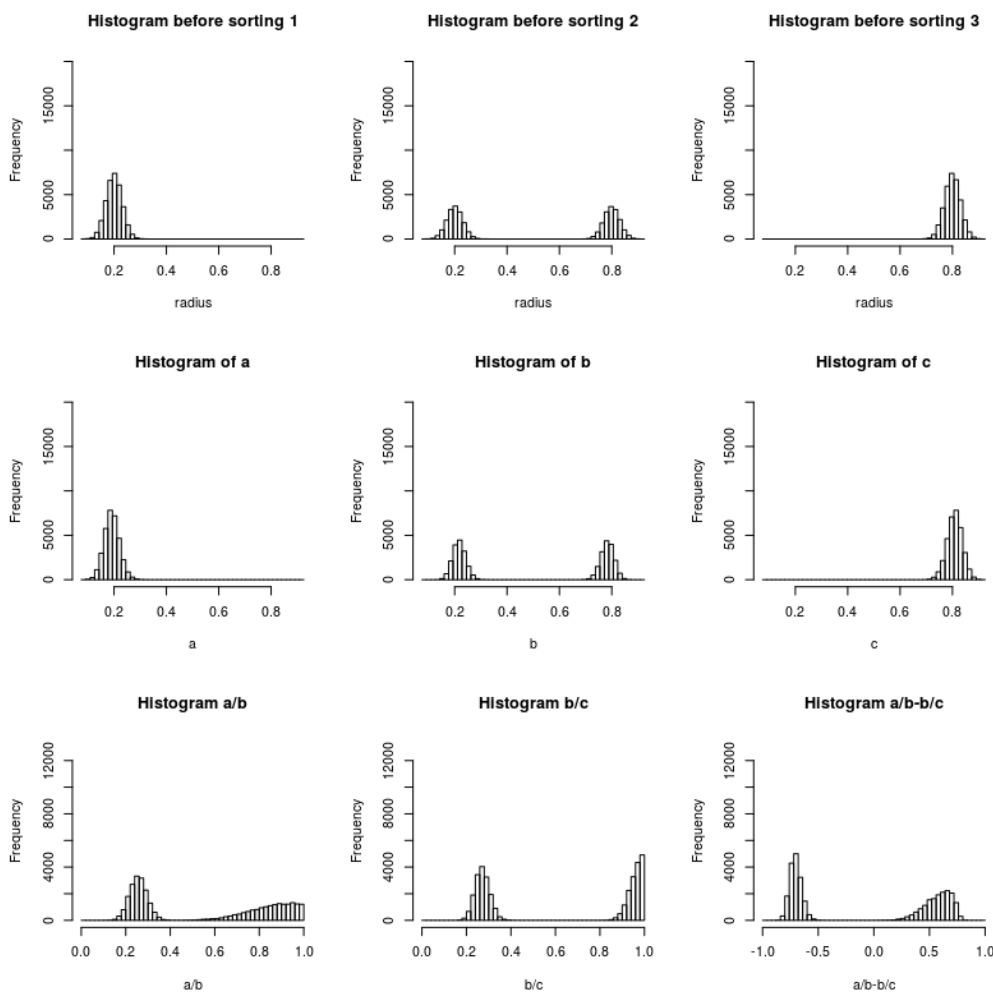

**Figure S8.** Numerical experiment with bimodal  $b$  radius.

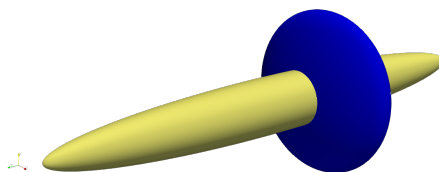

**Figure S9.** Two ellipsoids of same volume, but different axes as an example to show that EF can be non-unique. The yellow ellipsoid has  $(x,y,z)$  axis lengths of  $(1,1,9)$ , while the blue ellipsoid has  $(x,y,z)$  axis lengths of  $(3,3,1)$ . In this case, the pixels in the intersection of the two ellipsoids will have non-unique EF (assuming the two ellipsoids are locally maximal).

contact 1      filter 0      filter 1.5      filter 2.5      filter 3.5

34

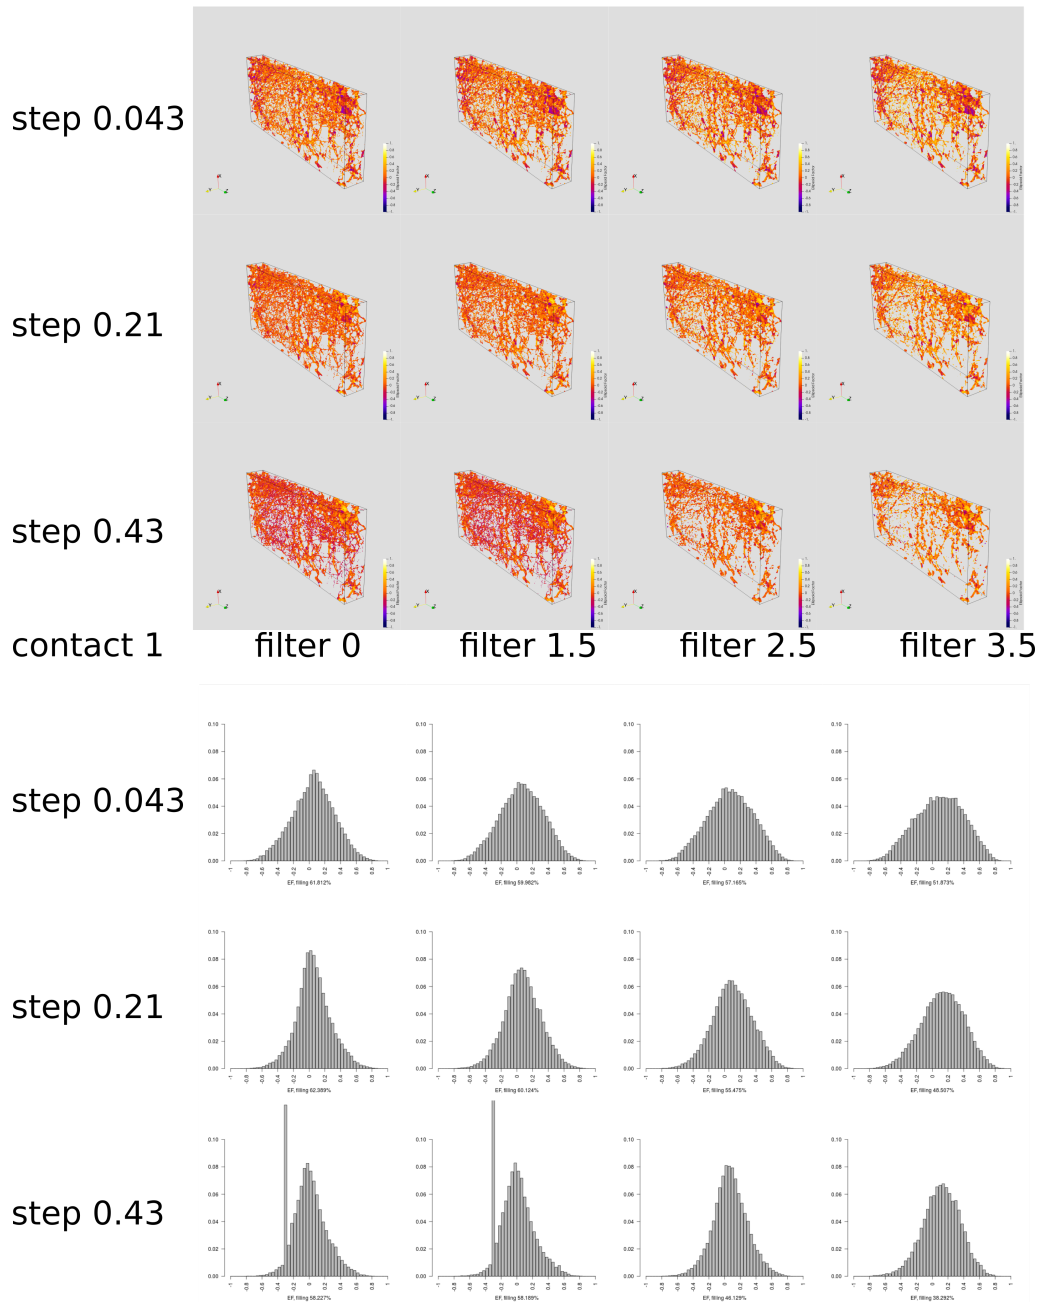

rsos.royalsocietypublishing.org R. Soc. open sci. 0000000

**Figure S10.** Renders and histograms of the EF image of vertebral sample 57 with a contact sensitivity of 1 and various step sizes and semi-axis filters. A large step size causes comparatively small features to fill up with ellipsoids that have taken only a few steps in every direction (e.g. 3,3 and 2). These ellipsoid cause the spurious mode in the corresponding histogram. This effect is reduced by using a smaller step size or a larger filter. The larger filter changes the distribution, however.

contact 5      filter 0      filter 1.5      filter 2.5      filter 3.5

35

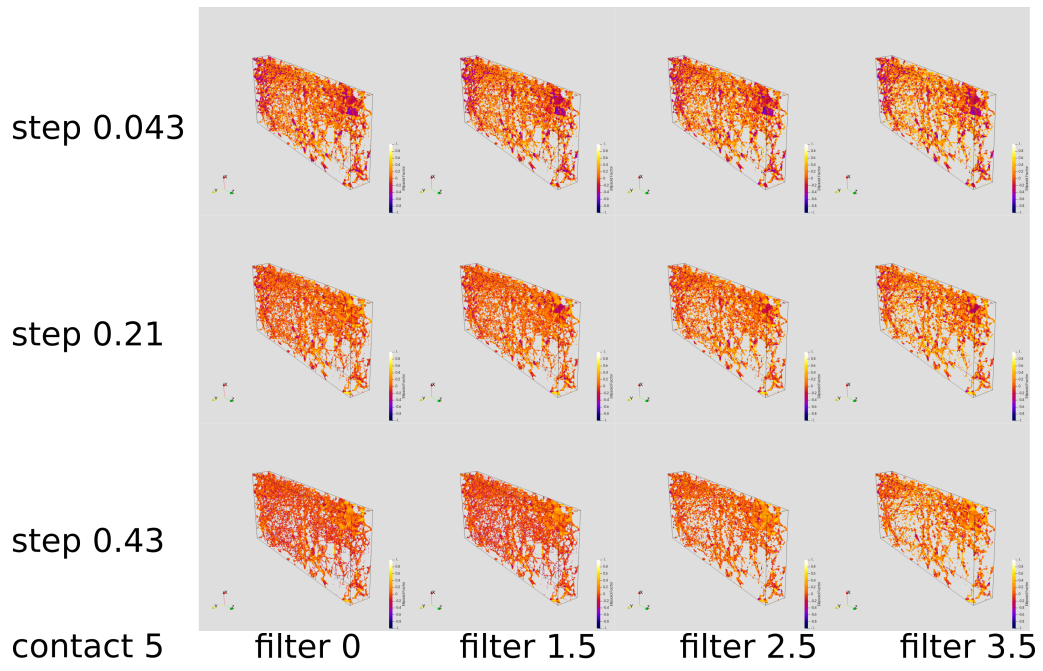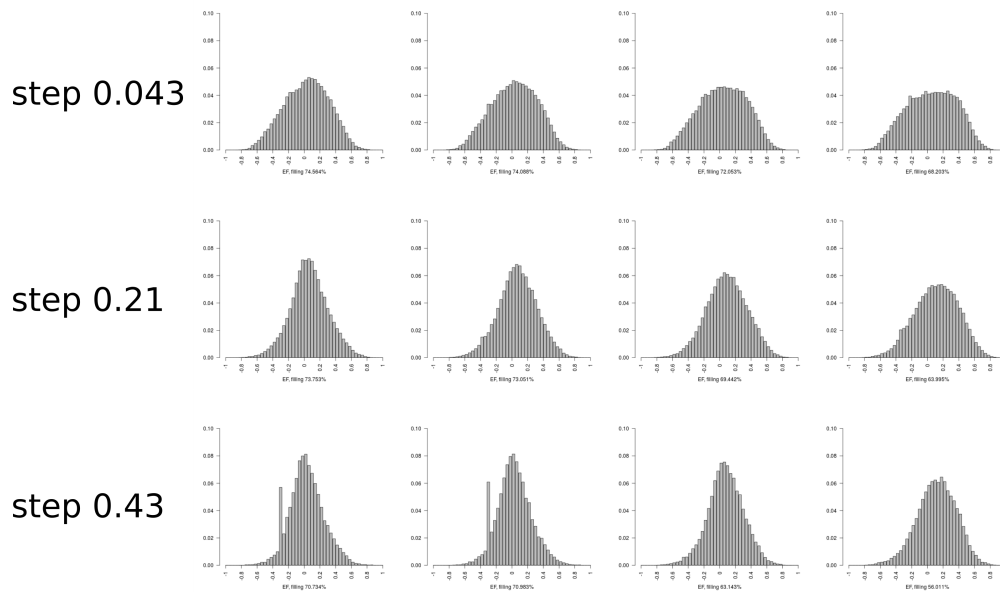

**Figure S11.** Renders and histograms of the EF image of vertebral sample 57 with a contact sensitivity of 5 and various step sizes and semi-axis filters. A large step size causes comparatively small features to fill up with ellipsoids that have taken only a few steps in every direction (e.g. 3,3 and 2). These ellipsoid cause the spurious mode in the corresponding histogram. This effect is reduced by using a smaller step size or a larger filter.
